# Supplementary material for: STEED: A data mining tool for automated extraction of experimental parameters and risk of bias items from in vivo publications
Source: PubMed Central journal article supplement (PMC11594395; doi:10.1371/journal.pone.0311358), 2024-11-26
Supplement: pone.0311358.s001.pdf [file pone.0311358.s001.pdf]

## Supplementary reference list

### Training set

Number of records: 45

Topic: Amyotrophic lateral sclerosis

- [1] I. Allodi, R. Montañana-Rosell, R. Selvan, P. Löw, and O. Kiehn, Locomotor deficits in a mouse model of ALS are paralleled by loss of V1-interneuron connections onto fast motor neurons. *Nat Commun* 12 (2021) 3251.
- [2] S. Anzilotti, V. Valsecchi, P. Brancaccio, N. Guida, G. Laudati, V. Tedeschi, T. Petrozziello, F. Frecentese, E. Magli, B. Hassler, O. Cuomo, L. Formisano, A. Secondo, L. Annunziato, and G. Pignataro, Prolonged NCX activation prevents SOD1 accumulation, reduces neuroinflammation, ameliorates motor behavior and prolongs survival in a ALS mouse model. *Neurobiol Dis* 159 (2021) 105480.
- [3] S. Apolloni, P. Fabbrizio, S. Amadio, G. Napoli, M. Freschi, F. Sironi, P. Pevarello, P. Tarroni, C. Liberati, C. Bendotti, and C. Volonté, Novel P2X7 Antagonist Ameliorates the Early Phase of ALS Disease and Decreases Inflammation and Autophagy in SOD1-G93A Mouse Model. *Int J Mol Sci* 22 (2021).
- [4] A. Arnoux, E. Ayme-Dietrich, S. Dieterle, M.A. Goy, S. Schann, M. Frauli, L. Monassier, and L. Dupuis, Evaluation of a 5-HT(2B) receptor agonist in a murine model of amyotrophic lateral sclerosis. *Sci Rep* 11 (2021) 23582.
- [5] D. Bayer, S. Antonucci, H.P. Müller, R. Saad, L. Dupuis, V. Rasche, T.M. Böckers, A.C. Ludolph, J. Kassubek, and F. Roselli, Disruption of orbitofrontal-hypothalamic projections in a murine ALS model and in human patients. *Transl Neurodegener* 10 (2021) 17.
- [6] T. Burg, E. Rossaert, M. Moisse, P. Van Damme, and L. Van Den Bosch, Histone Deacetylase Inhibition Regulates Lipid Homeostasis in a Mouse Model of Amyotrophic Lateral Sclerosis. *Int J Mol Sci* 22 (2021).
- [7] I. Casola, B.M. Scicchitano, E. Lepore, S. Mandillo, E. Golini, C. Nicoletti, L. Barberi, G. Dobrowolny, and A. Musarò, Circulating myomiRs in Muscle Denervation: From Surgical to ALS Pathological Condition. *Cells* 10 (2021).
- [8] L. Chen, R. Na, K. Danae McLane, C.S. Thompson, J. Gao, X. Wang, and Q. Ran, Overexpression of ferroptosis defense enzyme Gpx4 retards motor neuron disease of SOD1G93A mice. *Sci Rep* 11 (2021) 12890.
- [9] K. Cieminski, D.J. Flis, K. Dzik, J.J. Kaczor, E. Czyrko, M. Halon-Golabek, M.R. Wieckowski, J. Antosiewicz, and W. Ziolkowski, Swim training affects Akt signaling and ameliorates loss of skeletal muscle mass in a mouse model of amyotrophic lateral sclerosis. *Sci Rep* 11 (2021) 20899.
- [10] G. Coccozza, S. Garofalo, M. Morotti, G. Chece, A. Grimaldi, M. Lecce, F. Scavizzi, R. Menghini, V. Casagrande, M. Federici, M. Raspa, H. Wulff, and C. Limatola, The feeding behaviour of Amyotrophic Lateral Sclerosis mouse models is modulated by the Ca<sup>2+</sup>-activated K(Ca) 3.1 channels. *Br J Pharmacol* 178 (2021) 4891-4906.
- [11] K.P. Dzik, D.J. Flis, Z.K. Bytowska, M.J. Karnia, W. Ziolkowski, and J.J. Kaczor, Swim Training Ameliorates Hyperlocomotion of ALS Mice and Increases Glutathione Peroxidase Activity in the Spinal Cord. *Int J Mol Sci* 22 (2021).

- [12] P. Fabbrizio, J. D'Agostino, C. Margotta, G. Mella, N. Panini, L. Pasetto, E. Sammali, F. Raggi, G. Sorarù, V. Bonetto, C. Bendotti, and G. Nardo, Contingent intramuscular boosting of P2XR7 axis improves motor function in transgenic ALS mice. *Cell Mol Life Sci* 79 (2021) 7.
- [13] L.C. Fernández-Beltrán, J.M. Godoy-Corchuelo, M. Losa-Fontangordo, D. Williams, J. Matias-Guiu, and S. Corrochano, A Transcriptomic Meta-Analysis Shows Lipid Metabolism Dysregulation as an Early Pathological Mechanism in the Spinal Cord of SOD1 Mice. *Int J Mol Sci* 22 (2021).
- [14] A. Ferrer-Donato, A. Contreras, L.M. Frago, J.A. Chowen, and C.M. Fernandez-Martos, Alterations in Leptin Signaling in Amyotrophic Lateral Sclerosis (ALS). *Int J Mol Sci* 22 (2021).
- [15] S. Garbuzova-Davis, K.J. Boccio, A. Llauget, R. Shell, S. Hailu, H. Mustafa, J. Ehrhart, P.R. Sanberg, S.H. Appel, and C.V. Borlongan, Beneficial Effects of Transplanted Human Bone Marrow Endothelial Progenitors on Functional and Cellular Components of Blood-Spinal Cord Barrier in ALS Mice. *eNeuro* 8 (2021).
- [16] Á. Gento-Caro, E. Vilches-Herrando, F. Portillo, D. González-Forero, and B. Moreno-López, Targeting autotaxin impacts disease advance in the SOD1-G93A mouse model of amyotrophic lateral sclerosis. *Brain Pathol* 32 (2022) e13022.
- [17] M. Gómez-Almería, S. Burgaz, C. Costas-Insua, C. Rodríguez-Cueto, I. Santos-García, I. Rodríguez-Crespo, C. García, M. Guzmán, E. de Lago, and J. Fernández-Ruiz, BiP Heterozygosity Aggravates Pathological Deterioration in Experimental Amyotrophic Lateral Sclerosis. *Int J Mol Sci* 22 (2021).
- [18] F. Gouel, K. Timmerman, P. Gosset, C. Raoul, M. Dutheil, A. Jonneaux, G. Garçon, C. Moreau, V. Danel-Brunaud, J. Duce, T. Burnouf, J.C. Devedjian, and D. Devos, Whole and fractionated human platelet lysate biomaterials-based biotherapy induces strong neuroprotection in experimental models of amyotrophic lateral sclerosis. *Biomaterials* 280 (2022) 121311.
- [19] A. Keerie, H. Brown-Wright, I. Kirkland, A. Grierson, J.J.P. Alix, C. Holscher, and R.J. Mead, The GLP-1 receptor agonist, liraglutide, fails to slow disease progression in SOD1(G93A) and TDP-43(Q331K) transgenic mouse models of ALS. *Sci Rep* 11 (2021) 17027.
- [20] I. Keskin, E. Ekhtiari Bidhendi, M. Marklund, P.M. Andersen, T. Brännström, S.L. Marklund, and U. Nordström, Peripheral administration of SOD1 aggregates does not transmit pathogenic aggregation to the CNS of SOD1 transgenic mice. *Acta Neuropathol Commun* 9 (2021) 111.
- [21] V. La Cognata, E. Golini, R. Iemmolo, S. Balletta, G. Morello, C. De Rosa, A. Villari, S. Marinelli, V. Vacca, G. Bonaventura, P. Dell'Albani, E. Aronica, F. Mammano, S. Mandillo, and S. Cavallaro, CXCR2 increases in ALS cortical neurons and its inhibition prevents motor neuron degeneration in vitro and improves neuromuscular function in SOD1G93A mice. *Neurobiol Dis* 160 (2021) 105538.
- [22] P.A. Leermakers, M. Skov, A. Riisager, O.B. Nielsen, and T.H. Pedersen, Alterations in fast-twitch muscle membrane conductance regulation do not explain decreased muscle function of SOD1(G93A) rats. *Muscle Nerve* 64 (2021) 755-764.
- [23] X. Li, C. Chen, X. Zhan, B. Li, Z. Zhang, S. Li, Y. Xie, X. Song, Y. Shen, J. Liu, P. Liu, G.P. Liu, and X. Yang, R13 preserves motor performance in SOD1(G93A) mice by improving mitochondrial function. *Theranostics* 11 (2021) 7294-7307.
- [24] J.S. Lum, M.L. Brown, N.E. Farrowell, L. McAlary, D. Ly, C.G. Chisholm, J. Snow, K.L. Vine, T. Karl, F. Kreilhaus, L.E. McInnes, S. Nikseresht, P.S. Donnelly, P.J. Crouch, and J.J. Yerbury, CuATSM improves motor function and extends survival but is not tolerated at a high dose in SOD1(G93A) mice with a C57BL/6 background. *Sci Rep* 11 (2021) 19392.

- [25] M. MacLean, J. Juranek, S. Cuddapah, R. López-Díez, H.H. Ruiz, J. Hu, L. Frye, H. Li, P.F. Gugger, and A.M. Schmidt, Microglia RAGE exacerbates the progression of neurodegeneration within the SOD1(G93A) murine model of amyotrophic lateral sclerosis in a sex-dependent manner. *J Neuroinflammation* 18 (2021) 139.
- [26] Y.F. Malada Edelstein, Y. Solomonov, N. Hadad, L. Alfahel, A. Israelson, and R. Levy, Early upregulation of cytosolic phospholipase A(2) $\alpha$  in motor neurons is induced by misfolded SOD1 in a mouse model of amyotrophic lateral sclerosis. *J Neuroinflammation* 18 (2021) 274.
- [27] R. Massopust, D. Juros, D. Shapiro, M. Lopes, S.M. Haldar, T. Taetzsch, and G. Valdez, KLF15 overexpression in myocytes fails to ameliorate ALS-related pathology or extend the lifespan of SOD1G93A mice. *Neurobiol Dis* 162 (2022) 105583.
- [28] T.S. McDonald, V. Kumar, J.N. Fung, T.M. Woodruff, and J.D. Lee, Glucose clearance and uptake is increased in the SOD1(G93A) mouse model of amyotrophic lateral sclerosis through an insulin-independent mechanism. *Faseb j* 35 (2021) e21707.
- [29] I. Méndez-López, F.J. Sancho-Bielsa, T. Engel, A.G. García, and J.F. Padín, Progressive Mitochondrial SOD1(G93A) Accumulation Causes Severe Structural, Metabolic and Functional Aberrations through OPA1 Down-Regulation in a Mouse Model of Amyotrophic Lateral Sclerosis. *Int J Mol Sci* 22 (2021).
- [30] M. Milani, E. Mammarella, S. Rossi, C. Miele, S. Lattante, M. Sabatelli, M. Cozzolino, N. D'Ambrosi, and S. Apolloni, Targeting S100A4 with niclosamide attenuates inflammatory and profibrotic pathways in models of amyotrophic lateral sclerosis. *J Neuroinflammation* 18 (2021) 132.
- [31] E. Minj, S. Upadhayay, and S. Mehan, Nrf2/HO-1 Signaling Activator Acetyl-11-keto-beta Boswellic Acid (AKBA)-Mediated Neuroprotection in Methyl Mercury-Induced Experimental Model of ALS. *Neurochem Res* 46 (2021) 2867-2884.
- [32] N. Ohashi, T. Terashima, M. Katagi, Y. Nakae, J. Okano, Y. Suzuki, and H. Kojima, GLT1 gene delivery based on bone marrow-derived cells ameliorates motor function and survival in a mouse model of ALS. *Sci Rep* 11 (2021) 12803.
- [33] I. Orienti, M. Armida, G. Dobrowolny, R. Peponi, G. Sollazzini, A. Pezzola, I. Casola, A. Musarò, P. Popoli, and R.L. Potenza, Fenretinide Beneficial Effects on Amyotrophic Lateral Sclerosis-associated SOD1(G93A) Mutant Protein Toxicity: In Vitro and In Vivo Evidences. *Neuroscience* 473 (2021) 1-12.
- [34] L. Pasetto, S. Callegaro, A. Corbelli, F. Fiordaliso, D. Ferrara, L. Brunelli, G. Sestito, R. Pastorelli, E. Bianchi, M. Cretich, M. Chiari, C. Potrich, C. Moglia, M. Corbo, G. Sorarù, C. Lunetta, A. Calvo, A. Chiò, G. Mora, M. Pennuto, A. Quattrone, F. Rinaldi, V.G. D'Agostino, M. Basso, and V. Bonetto, Decoding distinctive features of plasma extracellular vesicles in amyotrophic lateral sclerosis. *Mol Neurodegener* 16 (2021) 52.
- [35] M. Peric, L. Nikolic, P.R. Andjus, and D. Bataveljic, Dysfunction of oligodendrocyte inwardly rectifying potassium channel in a rat model of amyotrophic lateral sclerosis. *Eur J Neurosci* 54 (2021) 6339-6354.
- [36] J. Post, A. Schaffrath, I. Gering, S. Hartwig, S. Lehr, N.J. Shah, K.J. Langen, D. Willbold, J. Kutzsche, and A. Willuweit, Oral Treatment with RD2RD2 Impedes Development of Motoric Phenotype and Delays Symptom Onset in SOD1(G93A) Transgenic Mice. *Int J Mol Sci* 22 (2021).
- [37] W. Shiraishi, R. Yamasaki, Y. Hashimoto, S. Ko, Y. Kobayakawa, N. Isobe, T. Matsushita, and J.I. Kira, Clearance of peripheral nerve misfolded mutant protein by infiltrated macrophages correlates with motor neuron disease progression. *Sci Rep* 11 (2021) 16438.

- [38] J. Stein, B. Walkenfort, H. Cihankaya, M. Hasenberg, V. Bader, K.F. Winklhofer, P. Röderer, J. Matschke, C. Theiss, and V. Matschke, Increased ROS-Dependent Fission of Mitochondria Causes Abnormal Morphology of the Cell Powerhouses in a Murine Model of Amyotrophic Lateral Sclerosis. *Oxid Med Cell Longev* 2021 (2021) 6924251.
- [39] P.H. Truong, P.J. Crouch, J.B.W. Hilton, C.A. McLean, R. Cappai, and G.D. Ciccotosto, Sex-dependent effects of amyloid precursor-like protein 2 in the SOD1-G37R transgenic mouse model of MND. *Cell Mol Life Sci* 78 (2021) 6605-6630.
- [40] J. Wang, L. Tierney, R. Mann, T. Lonsway, and C.L. Walker, Bisperoxovanadium promotes motor neuron survival and neuromuscular innervation in amyotrophic lateral sclerosis. *Mol Brain* 14 (2021) 155.
- [41] T. Wang, D. Tomas, N.D. Perera, B. Cuic, S. Luikinga, A. Viden, S.K. Barton, C.A. McLean, A.L. Samson, A. Southon, A.I. Bush, J.M. Murphy, and B.J. Turner, Ferroptosis mediates selective motor neuron death in amyotrophic lateral sclerosis. *Cell Death Differ* 29 (2022) 1187-1198.
- [42] J.A. Watkins, J.J.P. Alix, P.J. Shaw, and R.J. Mead, Extensive phenotypic characterisation of a human TDP-43(Q331K) transgenic mouse model of amyotrophic lateral sclerosis (ALS). *Sci Rep* 11 (2021) 16659.
- [43] T.L. Wells, J.R. Myles, and T. Akay, C-Boutons and Their Influence on Amyotrophic Lateral Sclerosis Disease Progression. *J Neurosci* 41 (2021) 8088-8101.
- [44] T.G. Woo, M.H. Yoon, S.M. Kang, S. Park, J.H. Cho, Y.J. Hwang, J. Ahn, H. Jang, Y.J. Shin, E.M. Jung, N.C. Ha, B.H. Kim, Y. Kwon, and B.J. Park, Novel chemical inhibitor against SOD1 misfolding and aggregation protects neuron-loss and ameliorates disease symptoms in ALS mouse model. *Commun Biol* 4 (2021) 1397.
- [45] A.L. Wright, P.A. Della Gatta, S. Le, B.A. Berning, P. Mehta, K.R. Jacobs, H. Gul, R. San Gil, T.J. Hedl, W.R. Riddell, O. Watson, S.S. Keating, J. Venturato, R.S. Chung, J.D. Atkin, A. Lee, B. Shi, C.A. Blizzard, M. Morsch, and A.K. Walker, Riluzole does not ameliorate disease caused by cytoplasmic TDP-43 in a mouse model of amyotrophic lateral sclerosis. *Eur J Neurosci* 54 (2021) 6237-6255.

## **Validation set 1**

Number of records: 31

Topic: Amyotrophic lateral sclerosis

- [1] P.R. Andjus, D. Bataveljić, G. Vanhoutte, D. Mitrecic, F. Pizzolante, N. Djogo, C. Nicaise, F. Gankam Kengne, C. Gangitano, F. Michetti, A. van der Linden, R. Pochet, and G. Bacić, In vivo morphological changes in animal models of amyotrophic lateral sclerosis and Alzheimer's-like disease: MRI approach. *Anatomical record (Hoboken, N.J. : 2007)* 292 (2009) 1882-92.
- [2] F. Angenstein, H.G. Niessen, J. Goldschmidt, S. Vielhaber, A.C. Ludolph, and H. Scheich, Age-dependent changes in MRI of motor brain stem nuclei in a mouse model of ALS. *Neuroreport* 15 (2004) 2271-4.
- [3] D. Bataveljić, S. Stamenković, G. Bačić, and P.R. Andjus, Imaging cellular markers of neuroinflammation in the brain of the rat model of amyotrophic lateral sclerosis. *Acta physiologica Hungarica* 98 (2011) 27-31.

- [4] P. Bigini, V. Diana, S. Barbera, E. Fumagalli, E. Micotti, L. Sitia, A. Paladini, C. Bisighini, L. De Grada, L. Coloca, L. Colombo, P. Manca, P. Bossolasco, F. Malvestiti, F. Fiordaliso, G. Forloni, M. Morbidelli, M. Salmona, D. Giardino, T. Mennini, D. Moscatelli, V. Silani, and L. Cova, Longitudinal tracking of human fetal cells labeled with super paramagnetic iron oxide nanoparticles in the brain of mice with motor neuron disease. *PloS one* 7 (2012) e32326.
- [5] R. Bonafede, E. Turano, I. Scambi, A. Busato, P. Bontempi, F. Virla, L. Schiaffino, P. Marzola, B. Bonetti, and R. Mariotti, ASC-Exosomes Ameliorate the Disease Progression in SOD1(G93A) Murine Model Underlining Their Potential Therapeutic Use in Human ALS. *International journal of molecular sciences* 21 (2020).
- [6] P. Bontempi, A. Busato, R. Bonafede, L. Schiaffino, I. Scambi, A. Sbarbati, R. Mariotti, and P. Marzola, MRI reveals therapeutical efficacy of stem cells: An experimental study on the SOD1(G93A) animal model. *Magnetic resonance in medicine* 79 (2018) 459-469.
- [7] S. Bucher, K.E. Braunstein, H.G. Niessen, T. Kaulisch, M. Neumaier, T.M. Boeckers, D. Stiller, and A.C. Ludolph, Vacuolization correlates with spin-spin relaxation time in motor brainstem nuclei and behavioural tests in the transgenic G93A-SOD1 mouse model of ALS. *The European journal of neuroscience* 26 (2007) 1895-901.
- [8] L. Canzi, V. Castellaneta, S. Navone, S. Nava, M. Dossena, I. Zucca, T. Mennini, P. Bigini, and E.A. Parati, Human skeletal muscle stem cell antiinflammatory activity ameliorates clinical outcome in amyotrophic lateral sclerosis models. *Molecular medicine (Cambridge, Mass.)* 18 (2012) 401-11.
- [9] I. Caron, E. Micotti, A. Paladini, G. Merlino, L. Plebani, G. Forloni, M. Modo, and C. Bendotti, Comparative Magnetic Resonance Imaging and Histopathological Correlates in Two SOD1 Transgenic Mouse Models of Amyotrophic Lateral Sclerosis. *PloS one* 10 (2015) e0132159.
- [10] J.K. Choi, A. Dedeoglu, and B.G. Jenkins, Longitudinal monitoring of motor neuron circuitry in FALS rats using in-vivo pHMRI. *Neuroreport* 21 (2010) 157-62.
- [11] G.J. Cowin, T.J. Butler, N.D. Kurniawan, C. Watson, and R.H. Wallace, Magnetic resonance microimaging of the spinal cord in the SOD1 mouse model of amyotrophic lateral sclerosis detects motor nerve root degeneration. *NeuroImage* 58 (2011) 69-74.
- [12] M.C. Evans, P.J. Gaillard, M. de Boer, C. Appeldoorn, R. Dorland, N.R. Sibson, M.R. Turner, D.C. Anthony, and H.B. Stolp, CNS-targeted glucocorticoid reduces pathology in mouse model of amyotrophic lateral sclerosis. *Acta neuropathologica communications* 2 (2014) 66.
- [13] M.C. Evans, S. Serres, A.A. Khrapitchev, H.B. Stolp, D.C. Anthony, K. Talbot, M.R. Turner, and N.R. Sibson, T<sub>2</sub>-weighted MRI detects presymptomatic pathology in the SOD1 mouse model of ALS. *Journal of cerebral blood flow and metabolism : official journal of the International Society of Cerebral Blood Flow and Metabolism* 34 (2014) 785-93.
- [14] M. Figini, A. Scotti, S. Marcuzzo, S. Bonanno, F. Padelli, V. Moreno-Manzano, J.M. García-Verdugo, P. Bernasconi, R. Mantegazza, M.G. Bruzzone, and I. Zucca, Comparison of Diffusion MRI Acquisition Protocols for the In Vivo Characterization of the Mouse Spinal Cord: Variability Analysis and Application to an Amyotrophic Lateral Sclerosis Model. *PloS one* 11 (2016) e0161646.
- [15] J. Gao, M. Jiang, R.L. Magin, R.G. Gatto, G. Morfini, A.C. Larson, and W. Li, Multicomponent diffusion analysis reveals microstructural alterations in spinal cord of a mouse model of amyotrophic lateral sclerosis ex vivo. *PloS one* 15 (2020) e0231598.

- [16] R.G. Gatto, M. Amin, A. Finkielstein, C. Weissmann, T. Barrett, C. Lamoutte, O. Uchitel, R. Sumagin, T.H. Mareci, and R.L. Magin, Unveiling early cortical and subcortical neuronal degeneration in ALS mice by ultra-high field diffusion MRI. *Amyotrophic lateral sclerosis & frontotemporal degeneration* 20 (2019) 549-561.
- [17] R.G. Gatto, W. Li, J. Gao, and R.L. Magin, In vivo diffusion MRI detects early spinal cord axonal pathology in a mouse model of amyotrophic lateral sclerosis. *NMR in biomedicine* 31 (2018) e3954.
- [18] R.G. Gatto, W. Li, and R.L. Magin, Diffusion tensor imaging identifies presymptomatic axonal degeneration in the spinal cord of ALS mice. *Brain research* 1679 (2018) 45-52.
- [19] R.G. Gatto, S.M. Mustafi, M.Y. Amin, T.H. Mareci, Y.C. Wu, and R.L. Magin, Neurite orientation dispersion and density imaging can detect presymptomatic axonal degeneration in the spinal cord of ALS mice. *Functional neurology* 33 (2018) 155-163.
- [20] R.A. Grant, P.S. Sharp, A.J. Kennerley, J. Berwick, A. Grierson, T. Ramesh, and T.J. Prescott, Abnormalities in whisking behaviour are associated with lesions in brain stem nuclei in a mouse model of amyotrophic lateral sclerosis. *Behavioural brain research* 259 (2014) 274-83.
- [21] G. Grolez, M. Kyheng, R. Lopes, C. Moreau, K. Timmerman, F. Auger, G. Kuchcinski, A. Duhamel, P. Jissendi-Tchofo, P. Besson, C. Laloux, M. Petrault, J.C. Devedjian, T. Pérez, P.F. Pradat, L. Defebvre, R. Bordet, V. Danel-Brunaud, and D. Devos, MRI of the cervical spinal cord predicts respiratory dysfunction in ALS. *Scientific reports* 8 (2018) 1828.
- [22] Y. Jouroukhin, R. Ostritsky, Y. Assaf, G. Pelled, E. Giladi, and I. Gozes, NAP (davunetide) modifies disease progression in a mouse model of severe neurodegeneration: protection against impairments in axonal transport. *Neurobiology of disease* 56 (2013) 79-94.
- [23] M. Majchrzak, K. Drela, A. Andrzejewska, P. Rogujski, S. Figurska, M. Fiedorowicz, P. Walczak, M. Janowski, B. Lukomska, and L. Stanaszek, SOD1/Rag2 Mice with Low Copy Number of SOD1 Gene as a New Long-Living Immunodeficient Model of ALS. *Scientific reports* 9 (2019) 799.
- [24] S. Marcuzzo, S. Bonanno, M. Figini, A. Scotti, I. Zucca, L. Minati, N. Riva, T. Domi, A. Fossaghi, A. Quattrini, B. Galbardi, S. D'Alessandro, M.G. Bruzzone, J.M. García-Verdugo, V. Moreno-Manzano, R. Mantegazza, and P. Bernasconi, A longitudinal DTI and histological study of the spinal cord reveals early pathological alterations in G93A-SOD1 mouse model of amyotrophic lateral sclerosis. *Experimental neurology* 293 (2017) 43-52.
- [25] S. Marcuzzo, I. Zucca, A. Mastropietro, N.K. de Rosbo, P. Cavalcante, S. Tartari, S. Bonanno, L. Preite, R. Mantegazza, and P. Bernasconi, Hind limb muscle atrophy precedes cerebral neuronal degeneration in G93A-SOD1 mouse model of amyotrophic lateral sclerosis: a longitudinal MRI study. *Experimental neurology* 231 (2011) 30-7.
- [26] C. Moreau, V. Danel, J.C. Devedjian, G. Grolez, K. Timmerman, C. Laloux, M. Petrault, F. Gouel, A. Jonneaux, M. Dutheil, C. Lachaud, R. Lopes, G. Kuchcinski, F. Auger, M. Kyheng, A. Duhamel, T. Pérez, P.F. Pradat, H. Blasco, C. Veyrat-Durebex, P. Corcia, P. Oeckl, M. Otto, L. Dupuis, G. Garçon, L. Defebvre, Z.I. Cabantchik, J. Duce, R. Bordet, and D. Devos, Could Conservative Iron Chelation Lead to Neuroprotection in Amyotrophic Lateral Sclerosis? *Antioxidants & redox signaling* 29 (2018) 742-748.
- [27] H.G. Niessen, F. Angenstein, K. Sander, W.S. Kunz, M. Teuchert, A.C. Ludolph, H.J. Heinze, H. Scheich, and S. Vielhaber, In vivo quantification of spinal and bulbar motor neuron degeneration in the G93A-SOD1 transgenic mouse model of ALS by T2 relaxation time and apparent diffusion coefficient. *Experimental neurology* 201 (2006) 293-300.

[28] C.K. Underwood, N.D. Kurniawan, T.J. Butler, G.J. Cowin, and R.H. Wallace, Non-invasive diffusion tensor imaging detects white matter degeneration in the spinal cord of a mouse model of amyotrophic lateral sclerosis. *NeuroImage* 55 (2011) 455-61.

[29] M.A. White, Z. Lin, E. Kim, C.M. Henstridge, E. Pena Altamira, C.K. Hunt, E. Burchill, I. Callaghan, A. Loreto, H. Brown-Wright, R. Mead, C. Simmons, D. Cash, M.P. Coleman, and J. Sreedharan, Sarm1 deletion suppresses TDP-43-linked motor neuron degeneration and cortical spine loss. *Acta neuropathologica communications* 7 (2019) 166.

[30] J.M. Wilson, M.S. Petrik, S.C. Grant, S.J. Blackband, J. Lai, and C.A. Shaw, Quantitative measurement of neurodegeneration in an ALS-PDC model using MR microscopy. *NeuroImage* 23 (2004) 336-43.

[31] D.W. Zang, Q. Yang, H.X. Wang, G. Egan, E.C. Lopes, and S.S. Cheema, Magnetic resonance imaging reveals neuronal degeneration in the brainstem of the superoxide dismutase 1 transgenic mouse model of amyotrophic lateral sclerosis. *The European journal of neuroscience* 20 (2004) 1745-51.

## **Validation set 2**

Number of records: 244

Topic: Multiple sclerosis

[1] T.O.K.k. Abakumova, A. A.; Zharova, M. V.; Pozdeeva, D. A.; Gubskii, I. L.; Shepeleva, I. I.; Antonova, O. M.; Nukolova, N. V.; Kekelidze, Z. I.; Chekhonin, V. P., Cuprizone Model as a Tool for Preclinical Studies of the Efficacy of Multiple Sclerosis Diagnosis and Therapy. *Bulletin of Experimental Biology and Medicine* 159 (2015) 111-115.

[2] P.K. Abramowski, S.; Ernst, T.; Lange, C.; Ittrich, H.; Schweizer, M.; Zander, A. R.; Martin, R.; Fehse, B., Mesenchymal Stromal/Stem Cells Do Not Ameliorate Experimental Autoimmune Encephalomyelitis and Are Not Detectable in the Central Nervous System of Transplanted Mice. *Stem Cells Dev* 25 (2016) 1134-48.

[3] P.K. Acs, M.; Norkute, A.; Johann, S.; Clarner, T.; Braun, A.; Berente, Z.; Komoly, S.; Beyer, C., 17beta-estradiol and progesterone prevent cuprizone provoked demyelination of corpus callosum in male mice. *Glia* 57 (2009) 807-14.

[4] S.M. Adler, J.; Williams, D. S.; Verbalis, J. G., Positive association between blood brain barrier disruption and osmotically-induced demyelination. *Multiple Sclerosis* 6 (2000) 24-31.

[5] S.V. Adler, J. G.; Williams, D., Effect of rapid correction of hyponatremia on the blood-brain barrier of rats. *Brain Research* 679 (1995) 135-43.

[6] S.V. Adler, J. G.; Meyers, S.; Simplaceanu, E.; Williams, D. S., Changes in cerebral blood flow and distribution associated with acute increases in plasma sodium and osmolality of chronic hyponatremic rats. *Experimental Neurology* 163 (2000) 63-71.

[7] M.J. Aggarwal, M. V.; Calabresi, P. A.; Mori, S.; Zhang, J., Probing mouse brain microstructure using oscillating gradient diffusion MRI. *Magnetic Resonance in Medicine* 67 (2012) 98-109.

[8] R.S. Aharoni, E.; Blumenfeld-Katzir, T.; Eilam, R.; Sela, M.; Assaf, Y.; Arnon, R., Magnetic resonance imaging characterization of different experimental autoimmune encephalomyelitis models and the therapeutic effect of glatiramer acetate. *Experimental Neurology* 240 (2013) 130-44.

- [9] E.T.L. Ahrens, D. H.; Readhead, C.; Brosnan, C. F.; Fraser, S. E.; Jacobs, R. E., MR microscopy of transgenic mice that spontaneously acquire experimental allergic encephalomyelitis. *Magnetic Resonance in Medicine* 40 (1998) 119-32.
- [10] E.M. Aizman, A.; Chapman, J.; Assaf, Y.; Kloog, Y., The combined treatment of Copaxone and Salirasib attenuates experimental autoimmune encephalomyelitis (EAE) in mice. *Journal of neuroimmunology* 229 (2010) 192-203.
- [11] A.H.W. All, P.; Agrawal, G.; Gorelik, M.; Lee, C.; Thakor, N. V.; Bulte, J. W.; Kerr, D. A., Effect of MOG sensitization on somatosensory evoked potential in Lewis rats. *Journal of the Neurological Sciences* 284 (2009) 81-9.
- [12] S.A.S.-Q. Anderson, J.; Jordan, E. K.; Arbab, A. S.; Martin, R.; McFarland, H.; Frank, J. A., Magnetic resonance imaging of labeled T-cells in a mouse model of multiple sclerosis. *Annals of Neurology* 55 (2004) 654-9.
- [13] D.C.S. Anthony, N. R.; McAteer, M. A.; Davis, B.; Choudhury, R. P., Detection of brain pathology by magnetic resonance imaging of iron oxide micro-particles. *Methods Mol Biol* 686 (2011) 213-27.
- [14] D.C.S. Anthony, N. R.; Losey, P.; Meier, D. P.; Leppert, D., Investigation of immune and CNS-mediated effects of fingolimod in the focal delayed-type hypersensitivity multiple sclerosis model. *Neuropharmacology* 79 (2014) 534-41.
- [15] M.K.B. Axthelm, D. N.; Marracci, G. H.; Su, W.; Mullaney, E. T.; Manoharan, M.; Kohama, S. G.; Pollaro, J.; Witkowski, E.; Wang, P.; Rooney, W. D.; Sherman, L. S.; Wong, S. W., Japanese macaque encephalomyelitis: a spontaneous multiple sclerosis-like disease in a nonhuman primate. *Annals of Neurology* 70 (2011) 362-73.
- [16] A.H.K. Badawi, P.; Wang, W. T.; Choi, I. Y.; Lee, P.; Vines, C. M.; Siahaan, T. J., Suppression of EAE and prevention of blood-brain barrier breakdown after vaccination with novel bifunctional peptide inhibitor. *Neuropharmacology* 62 (2012) 1874-81.
- [17] K.A. Baeten, P.; Hendriks, J.; Theunissen, E.; Gelan, J.; Hellings, N.; Stinissen, P., Tracking of myelin-reactive T cells in experimental autoimmune encephalomyelitis (EAE) animals using small particles of iron oxide and MRI. *NMR in biomedicine* 23 (2010) 601-9.
- [18] K.H. Baeten, J. J.; Hellings, N.; Theunissen, E.; Vanderlocht, J.; Ryck, L. D.; Gelan, J.; Stinissen, P.; Adriaensens, P., Visualisation of the kinetics of macrophage infiltration during experimental autoimmune encephalomyelitis by magnetic resonance imaging. *Journal of neuroimmunology* 195 (2008) 1-6.
- [19] J.C.L. Bell, Q.; Gan, Y.; Liu, Q.; Liu, Y.; Shi, F. D.; Turner, G. H., Visualization of inflammation and demyelination in 2D2 transgenic mice with rodent MRI. *Journal of neuroimmunology* 264 (2013) 35-40.
- [20] T.v.H. Ben-Hur, R. B.; Einstein, O.; Aharonowiz, M.; Xue, R.; Frost, E. E.; Mori, S.; Reubinoff, B. E.; Bulte, J. W., Serial in vivo MR tracking of magnetically labeled neural spheres transplanted in chronic EAE mice. *Magnetic Resonance in Medicine* 57 (2007) 164-71.
- [21] M.L. Bendszus, G.; Jestaedt, L.; Misselwitz, B.; Solymosi, L.; Toyka, K.; Stoll, G., Gadofluorine M enhancement allows more sensitive detection of inflammatory CNS lesions than T2-w imaging: a quantitative MRI study. *Brain* 131 (2008) 2341-52.



- [22] E.V. Beraud, A.; Regaya, I.; Confort-Gouny, S.; Siaud, P.; Ibarrola, D.; Le Fur, Y.; Barbaria, J.; Pellissier, J. F.; Sabatier, J. M.; Medina, I.; Cozzone, P. J., Block of neural Kv1.1 potassium channels for neuroinflammatory disease therapy. *Annals of Neurology* 60 (2006) 586-96.
- [23] C.H. Berger, P.; Kindler-Baumann, D.; Rudin, M.; Rausch, M., Analysis of lesion development during acute inflammation and remission in a rat model of experimental autoimmune encephalomyelitis by visualization of macrophage infiltration, demyelination and blood-brain barrier damage. *NMR in biomedicine* 19 (2006) 101-7.
- [24] I.E.M. Biton, A.; Kidron, D.; Assaf, Y.; Cohen, Y., Improved detectability of experimental allergic encephalomyelitis in excised swine spinal cords by high b-value q-space DWI. *Experimental Neurology* 195 (2005) 437-46.
- [25] S.M. Bittner, S. G.; Göbel, K.; Melzer, N.; Herrmann, A. M.; Simon, O. J.; Weishaupt, A.; Budde, T.; Bayliss, D. A.; Bendszus, M.; Wiendl, H., TASK1 modulates inflammation and neurodegeneration in autoimmune inflammation of the central nervous system. *Brain* 132 (2009) 2501-2516.
- [26] T.C.M. Blair, M.; Rawlings-Rhea, S. D.; Tagge, I.; Kohama, S. G.; Hollister-Smith, J.; Ferguson, B.; Woltjer, R. L.; Frederick, M. C.; Pollaro, J.; Rooney, W. D.; Sherman, L. S.; Bourdette, D. N.; Wong, S. W., Immunopathology of Japanese macaque encephalomyelitis is similar to multiple sclerosis. *Journal of neuroimmunology* 291 (2016) 1-10.
- [27] E.L.B. Blezer, J.; Brok, H. P.; Nicolay, K.; t Hart, B. A., Quantitative MRI-pathology correlations of brain white matter lesions developing in a non-human primate model of multiple sclerosis. *NMR in biomedicine* 20 (2007) 90-103.
- [28] E.L.D. Blezer, L. H.; Kooij, G.; Drexhage, J.; van der Pol, S. M.; Reijkerkerk, A.; Dijkhuizen, R. M.; de Vries, H. E., In vivo MR imaging of intercellular adhesion molecule-1 expression in an animal model of multiple sclerosis. *Contrast Media Mol Imaging* 10 (2015) 111-21.
- [29] S.E. Boretius, A.; Dallenga, T.; Wrzos, C.; Tammer, R.; Bruck, W.; Nessler, S.; Frahm, J.; Stadelmann, C., Assessment of lesion pathology in a new animal model of MS by multiparametric MRI and DTI. *NeuroImage* 59 (2012) 2678-88.
- [30] S.G. Boretius, I.; Demmer, I.; Bahr, M.; Diem, R.; Michaelis, T.; Frahm, J., MRI of optic neuritis in a rat model. *NeuroImage* 41 (2008) 323-34.
- [31] S.S. Boretius, B.; Watanabe, T.; Merkler, D.; Tammer, R.; Czeh, B.; Michaelis, T.; Frahm, J.; Fuchs, E., Monitoring of EAE onset and progression in the common marmoset monkey by sequential high-resolution 3D MRI. *NMR in biomedicine* 19 (2006) 41-9.
- [32] B.D. Brochet, V., Pathological correlates of magnetization transfer imaging abnormalities in animal models and humans with multiple sclerosis. *Neurology* 53 (1999) S12-7.
- [33] B.D. Brochet, M. S.; Touil, T.; Anne, O.; Caille, J. M.; Douset, V.; Petry, K. G., Early macrophage MRI of inflammatory lesions predicts lesion severity and disease development in relapsing EAE. *NeuroImage* 32 (2006) 266-74.
- [34] H.P.M.V.M. Brok, M.; Blezer, E.; Schantz, A.; Peritt, D.; Treacy, G.; Laman, J. D.; Bauer, J.; T Hart, B. A., Prevention of experimental autoimmune encephalomyelitis in common marmosets using an anti-IL-12p40 monoclonal antibody. *Journal of Immunology* 169 (2002) 6554-6563.
- [35] K.A.A. Broom, D. C.; Blamire, A. M.; Waters, S.; Styles, P.; Perry, V. H.; Sibson, N. R., MRI reveals that early changes in cerebral blood volume precede blood-brain barrier breakdown and overt pathology in MS-like lesions in rat brain. *J Cereb Blood Flow Metab* 25 (2005) 204-16.

- [36] M.D.K. Budde, J. H.; Liang, H. F.; Russell, J. H.; Cross, A. H.; Song, S. K., Axonal injury detected by in vivo diffusion tensor imaging correlates with neurological disability in a mouse model of multiple sclerosis. *NMR in biomedicine* 21 (2008) 589-97.
- [37] M.D.X. Budde, M.; Cross, A. H.; Song, S. K., Axial diffusivity is the primary correlate of axonal injury in the experimental autoimmune encephalomyelitis spinal cord: a quantitative pixelwise analysis. *Journal of Neuroscience* 29 (2009) 2805-13.
- [38] J.W.B.-H. Bulte, T.; Miller, B. R.; Mizrachi-Kol, R.; Einstein, O.; Reinhartz, E.; Zywicke, H. A.; Douglas, T.; Frank, J. A., MR microscopy of magnetically labeled neurospheres transplanted into the Lewis EAE rat brain. *Magnetic Resonance in Medicine* 50 (2003) 201-5.
- [39] A.F. Carambia, B.; Schwinge, D.; Bruns, O. T.; Salmen, S. C.; Ittrich, H.; Reimer, R.; Heine, M.; Huber, S.; Waurisch, C.; Eychmüller, A.; Wraith, D. C.; Korn, T.; Nielsen, P.; Weller, H.; Schramm, C.; Lüth, S.; Lohse, A. W.; Heeren, J.; Herkel, J., Nanoparticle-based autoantigen delivery to Treg-inducing liver sinusoidal endothelial cells enables control of autoimmunity in mice. *Journal of Hepatology* 62 (2015) 1349-1356.
- [40] H.S.W. Cate, Q. Z.; Kemper, D.; Merlo, D.; Wang, H. X.; Fang, K.; Egan, G. F.; Kilpatrick, T. J., Influence of methylprednisolone on magnetic resonance and histological measures during cuprizone-induced demyelination. *Neuroscience Letters* 483 (2010) 47-52.
- [41] P.U. Chandran, J.; Markosyan, S.; Lisowski, A.; Buck, W.; Chin, C. L.; Fox, G.; Luo, F.; Day, M., Magnetic resonance imaging and histological evidence for the blockade of cuprizone-induced demyelination in C57BL/6 mice. *Neuroscience* 202 (2012) 446-53.
- [42] C.C.Z. Chen, A.; Hsu, Y. H.; Chen, H. W.; Yang, L. C.; Chang, C., Neuroaxonal ion dyshomeostasis of the normal-appearing corpus callosum in experimental autoimmune encephalomyelitis. *Experimental Neurology* 210 (2008) 322-30.
- [43] J.W.B. Chen, M. O.; Aikawa, E.; Chiang, G.; Weissleder, R., Myeloperoxidase-targeted imaging of active inflammatory lesions in murine experimental autoimmune encephalomyelitis. *Brain* 131 (2008) 1123-33.
- [44] X.H. Chen, X.; Zou, Y.; Pi, R.; Liu, M.; Wang, T.; Zheng, X.; Liu, M.; Lin, M.; Liu, P.; Tao, L., Combined treatment with minocycline and prednisone attenuates experimental autoimmune encephalomyelitis in C57 BL/6 mice.[Erratum appears in *J Neuroimmunol.* 2009 Oct 30;215(1-2):130]. *Journal of neuroimmunology* 210 (2009) 22-9.
- [45] X.P. Chen, R.; Zou, Y.; Liu, M.; Ma, X.; Jiang, Y.; Mao, X.; Hu, X., Attenuation of experimental autoimmune encephalomyelitis in C57 BL/6 mice by osthole, a natural coumarin. *Eur J Pharmacol* 629 (2010) 40-6.
- [46] Z.C. Chen, J. T.; Johnson, M.; Gossman, Z. C.; Hendrickson, M.; Sakaie, K.; Martinez-Rubio, C.; Gale, J. T.; Trapp, B. D., Cuprizone does not induce CNS demyelination in nonhuman primates. *Ann* 2 (2015) 208-13.
- [47] C.L.P. Chin, M.; Bousquet, P. F.; Schwartz, A. J.; O'Connor, E. M.; Nelson, C. M.; Hradil, V. P.; Cox, B. F.; McRae, B. L.; Fox, G. B., Distinct spatiotemporal pattern of CNS lesions revealed by USPIO-enhanced MRI in MOG-induced EAE rats implicates the involvement of spino-olivocerebellar pathways. *Journal of neuroimmunology* 211 (2009) 49-55.
- [48] N.C. Collongues, J. B.; Blanc, F.; Steibel, J.; Lam, C. D.; Shabbir, A.; Trifilieff, E.; Honnorat, J.; Pham-Dinh, D.; Ghandour, M. S.; de Seze, J., The Brown Norway opticospinal model of demyelination: does

it mimic multiple sclerosis or neuromyelitis optica? *International Journal of Developmental Neuroscience* 30 (2012) 487-97.

[49] L.L.F. Cook, P. J.; Mitchell, J. R.; Karlik, S. J., In vivo 4.0-T magnetic resonance investigation of spinal cord inflammation, demyelination, and axonal damage in chronic-progressive experimental allergic encephalomyelitis. *Journal of Magnetic Resonance Imaging* 20 (2004) 563-71.

[50] L.L.F. Cook, P. J.; Karlik, S. J., Pathology-guided MR analysis of acute and chronic experimental allergic encephalomyelitis spinal cord lesions at 1.5T. *Journal of Magnetic Resonance Imaging* 22 (2005) 180-8.

[51] L.C. Cruz-Orengo, Y. J.; Kim, J. H.; Dorsey, D.; Song, S. K.; Klein, R. S., CXCR7 antagonism prevents axonal injury during experimental autoimmune encephalomyelitis as revealed by in vivo axial diffusivity. *Journal of Neuroinflammation* (2011) 170.

[52] A.K.R. de Santana Nunes, C.; de Oliveira, W. H.; Thomé, R.; Verinaud, L.; Tovar-Moll, F.; Peixoto, C. A., Phosphodiesterase-5 inhibition promotes remyelination by MCP-1/CCR-2 and MMP-9 regulation in a cuprizone-induced demyelination model. *Experimental Neurology* 275 (2016) 143-153.

[53] C.A.Z. DeBoy, J.; Dike, S.; Shats, I.; Jones, M.; Reich, D. S.; Mori, S.; Nguyen, T.; Rothstein, B.; Miller, R. H.; Griffin, J. T.; Kerr, D. A.; Calabresi, P. A., High resolution diffusion tensor imaging of axonal damage in focal inflammatory and demyelinating lesions in rat spinal cord. *Brain* 130 (2007) 2199-210.

[54] M.N.J. Degaonkar, R.; Jagannathan, N. R., Sequential diffusion-weighted magnetic resonance imaging study of lysophosphatidyl choline-induced experimental demyelinating lesion: an animal model of multiple sclerosis. *Journal of Magnetic Resonance Imaging* 16 (2002) 153-9.

[55] M.N.R. Degaonkar, P.; Jayasundar, R.; Jagannathan, N. R., Determination of relaxation characteristics during preacute stage of lysophosphatidyl choline-induced demyelinating lesion in rat brain: an animal model of multiple sclerosis. *Magnetic Resonance Imaging* 23 (2005) 69-73.

[56] M.S.T. Deloire, T.; Brochet, B.; Dousset, V.; Caille, J. M.; Petry, K. G., Macrophage brain infiltration in experimental autoimmune encephalomyelitis is not completely compromised by suppressed T-cell invasion: in vivo magnetic resonance imaging illustration in effective anti-VLA-4 antibody treatment. *Multiple Sclerosis* 10 (2004) 540-8.

[57] M.S.B. Deloire-Grassin, B.; Quesson, B.; Delalande, C.; Dousset, V.; Canioni, P.; Petry, K. G., In vivo evaluation of remyelination in rat brain by magnetization transfer imaging. *Journal of the Neurological Sciences* 178 (2000) 10-6.

[58] R.A.D. Desai, A. L.; Tachrount, M.; Kasti, M.; Laulund, F.; Golay, X.; Smith, K. J., Cause and prevention of demyelination in a model multiple sclerosis lesion. *Annals of Neurology* 79 (2016) 591-604.

[59] R.D. Diem, I.; Boretius, S.; Merkler, D.; Schmelting, B.; Williams, S. K.; Sattler, M. B.; Bahr, M.; Michaelis, T.; Frahm, J.; Bruck, W.; Fuchs, E., Autoimmune optic neuritis in the common marmoset monkey: comparison of visual evoked potentials with MRI and histopathology. *Investigative Ophthalmology & Visual Science* 49 (2008) 3707-14.

[60] R.L. Dommissie, D.; Spanoghe, M.; Van Audekerke, J.; Van der Linden, A.; Gravenmade, H.; Van de Vyver, F., Optimization of NMR micro imaging (1.9T, 4.7T, 7.4T) of the central nervous system of an animal model for multiple sclerosis, *Proceedings of the 13th Annual International Conference of the IEEE Engineering in Medicine and Biology Society*, Publ by IEEE, Piscataway, NJ, United States; Orlando, FL, USA, 1991, pp. 79-80.

- [61] V.B. Dousset, B.; Vital, A.; Gross, C.; Benazzouz, A.; Boullerne, A.; Bidabe, A. M.; Gin, A. M.; Caille, J. M., Lysolecithin-induced demyelination in primates: preliminary in vivo study with MR and magnetization transfer. *AJNR Am J Neuroradiol* 16 (1995) 225-31.
- [62] V.D. Dousset, C.; Ballarino, L.; Quesson, B.; Seilhan, D.; Coussemacq, M.; Thiaudiere, E.; Brochet, B.; Canioni, P.; Caille, J. M., In vivo macrophage activity imaging in the central nervous system detected by magnetic resonance. *Magnetic Resonance in Medicine* 41 (1999) 329-33.
- [63] H.J.M. Duckers, H. J.; Verhaagen, J.; Nicolay, K.; Gispen, W. H., Longitudinal in vivo magnetic resonance imaging studies in experimental allergic encephalomyelitis: effect of a neurotrophic treatment on cortical lesion development. *Neuroscience* 77 (1997) 1163-73.
- [64] R.D.v.d.P. Engberink, S. M.; Walczak, P.; van der Toorn, A.; Viergever, M. A.; Dijkstra, C. D.; Bulte, J. W.; de Vries, H. E.; Blezer, E. L., Magnetic resonance imaging of monocytes labeled with ultrasmall superparamagnetic particles of iron oxide using magneto-electroporation in an animal model of multiple sclerosis. *Molecular Imaging* 9 (2010) 268-77.
- [65] G.D.A. Esposito, L.; Bartoli, A.; Chaabane, L.; Terreno, E., Evaluation of the co-registration capabilities of a MRI/PET compatible bed in an Experimental autoimmune encephalomyelitis (EAE) model. *Nucl. Instrum. Methods Phys. Res. Sect. A-Accel. Spectrom. Dect. Assoc. Equip.* 702 (2013) 108-110.
- [66] M.F.G. Falangola, D. N.; Tabesh, A.; Hui, E. S.; Nie, X.; Jensen, J. H.; Gerum, S. V.; Hu, C.; Lafrancois, J.; Collins, H. R.; Helpner, J. A., Histological correlation of diffusional kurtosis and white matter modeling metrics in cuprizone-induced corpus callosum demyelination. *NMR in biomedicine* 27 (2014) 948-957.
- [67] M.H. Fang, D.; Zhang, F.; Hu, Z.; Yang, J.; Jiang, H.; Han, S., Antineuroinflammatory and neurotrophic effects of CNTF and C16 peptide in an acute experimental autoimmune encephalomyelitis rat models. *Frontiers in Neuroanatomy* 7 (2013).
- [68] S.B. Fjær, L.; Lundervold, A.; Myhr, K. M.; Pavlin, T.; Torkildsen, Ø; Wergeland, S., Deep gray matter demyelination detected by magnetization transfer ratio in the cuprizone model. *PLoS ONE* 8 (2013).
- [69] S.B. Fjaer, L.; Myhr, K. M.; Torkildsen, O.; Wergeland, S., Magnetization transfer ratio does not correlate to myelin content in the brain in the MOG-EAE mouse model. *Neurochemistry International* 83-84 (2015) 28-40.
- [70] S.B. Floris, E. L.; Schreibelt, G.; Dopp, E.; van der Pol, S. M.; Schadee-Eestermans, I. L.; Nicolay, K.; Dijkstra, C. D.; de Vries, H. E., Blood-brain barrier permeability and monocyte infiltration in experimental allergic encephalomyelitis: a quantitative MRI study. *Brain* 127 (2004) 616-27.
- [71] C.C.C. Ford, T. L.; Karp, J.; Herndon, R. M., Magnetic resonance imaging of experimental demyelinating lesions. *Magnetic Resonance in Medicine* 14 (1990) 461-81.
- [72] I.B. Gadjanski, S.; Williams, S. K.; Lingor, P.; Knoferle, J.; Sattler, M. B.; Fairless, R.; Hochmeister, S.; Suhs, K. W.; Michaelis, T.; Frahm, J.; Storch, M. K.; Bahr, M.; Diem, R., Role of n-type voltage-dependent calcium channels in autoimmune optic neuritis. *Annals of Neurology* 66 (2009) 81-93.
- [73] M.I.M. Gaitan, P.; Wohler, J.; Leibovitch, E.; Sati, P.; Calandri, I. L.; Merkle, H.; Massacesi, L.; Silva, A. C.; Jacobson, S.; Reich, D. S., Perivenular brain lesions in a primate multiple sclerosis model at 7-tesla magnetic resonance imaging. *Multiple Sclerosis* 20 (2014) 64-71.

- [74] P.J.R. Gareau, B. K.; Karlik, S. J.; Mitchell, J. R., Magnetization transfer and multicomponent T2 relaxation measurements with histopathologic correlation in an experimental model of MS. *Journal of Magnetic Resonance Imaging* 11 (2000) 586-95.
- [75] P.J.W. Gareau, A. C.; Cofer, G. P.; Johnson, G. A., Imaging inflammation: direct visualization of perivascular cuffing in EAE by magnetic resonance microscopy. *Journal of Magnetic Resonance Imaging* 16 (2002) 28-36.
- [76] F.C. Gilli, X.; Pachner, A. R.; Gimi, B., High-Resolution Diffusion Tensor Spinal Cord MRI Measures as Biomarkers of Disability Progression in a Rodent Model of Progressive Multiple Sclerosis. *PLoS ONE* 11 (2016) e0160071.
- [77] K.W. Gobel, J. H.; Herrmann, A. M.; Wachsmuth, L.; Pankratz, S.; Bittner, S.; Budde, T.; Kleinschnitz, C.; Faber, C.; Wiendl, H.; Meuth, S. G., 4-Aminopyridine ameliorates mobility but not disease course in an animal model of multiple sclerosis. *Experimental Neurology* 248 (2013) 62-71.
- [78] R.I.L. Grossman, R. P.; Macchi, P. J.; Joseph, P. M., MR of acute experimental allergic encephalomyelitis. *AJNR Am J Neuroradiol* 8 (1987) 1045-8.
- [79] C.L.B. Guglielmetti, D.; Santermans, E.; Salas-Perdomo, A.; Daans, J.; De Vocht, N.; Shah, D.; Hoornaert, C.; Praet, J.; Peerlings, J.; Kara, F.; Bigot, C.; Mai, Z.; Goossens, H.; Hens, N.; Hendrix, S.; Verhoye, M.; Planas, A. M.; Berneman, Z.; van der Linden, A.; Ponsaerts, P., Interleukin-13 immune gene therapy prevents CNS inflammation and demyelination via alternative activation of microglia and macrophages. *Glia* 64 (2016) 2181-2200.
- [80] C.V. Guglielmetti, J.; Roelant, E.; Mai, Z.; Daans, J.; Van Audekerke, J.; Naeyaert, M.; Vanhoutte, G.; Delgado, Y. Palacios R.; Praet, J.; Fieremans, E.; Ponsaerts, P.; Sijbers, J.; Van der Linden, A.; Verhoye, M., Diffusion kurtosis imaging probes cortical alterations and white matter pathology following cuprizone induced demyelination and spontaneous remyelination. *NeuroImage* 125 (2016) 363-77.
- [81] J.M. Guy, S.; Fitzsimmons, J.; Beck, B.; Rao, N. A., Disruption of the blood-brain barrier in experimental optic neuritis: immunocytochemical co-localization of H<sub>2</sub>O<sub>2</sub> and extravasated serum albumin. *Investigative Ophthalmology & Visual Science* 35 (1994) 1114-23.
- [82] J.R.S. Guy, P.; Leibovitch, E.; Jacobson, S.; Silva, A. C.; Reich, D. S., Custom fit 3D-printed brain holders for comparison of histology with MRI in marmosets. *Journal of Neuroscience Methods* 257 (2016) 55-63.
- [83] K.G.H. Haanstra, S. O.; Estêvão, D. M. L.; Blezer, E. L. A.; Bauer, J.; Yang, L. L.; Wyant, T.; Csizmadia, V.; T Hart, B. A.; Fedyk, E. R., Antagonizing the  $\alpha 4\beta 1$  integrin, but not  $\alpha 4\beta 7$ , inhibits leukocytic infiltration of the central nervous system in rhesus monkey experimental autoimmune encephalomyelitis. *Journal of Immunology* 190 (2013) 1961-1973.
- [84] J.S. Hao, A. R.; Turner, G. H.; Wu, J.; Whiteaker, P.; Lukas, R. J.; Shi, F. D., Attenuation of CNS inflammatory responses by nicotine involves  $\alpha 7$  and non- $\alpha 7$  nicotinic receptors. *Experimental Neurology* 227 (2011) 110-9.
- [85] L.A.S. Harsan, J.; Zaremba, A.; Agin, A.; Sapin, R.; Poulet, P.; Guignard, B.; Parizel, N.; Grucker, D.; Boehm, N.; Miller, R. H.; Ghandour, M. S., Recovery from chronic demyelination by thyroid hormone therapy: myelinogenesis induction and assessment by diffusion tensor magnetic resonance imaging. *Journal of Neuroscience* 28 (2008) 14189-201.
- [86] B.A.B. Hart, J.; Muller, H. J.; Melchers, B.; Nicolay, K.; Brok, H.; Bontrop, R. E.; Lassmann, H.; Massacesi, L., Histopathological characterization of magnetic resonance imaging-detectable brain

white matter lesions in a primate model of multiple sclerosis: a correlative study in the experimental autoimmune encephalomyelitis model in common marmosets (*Callithrix jacchus*). *American Journal of Pathology* 153 (1998) 649-63.

[87] C.P.M. Hawkins, P. M.; MacKenzie, F.; Kesselring, J.; Tofts, P. S.; du Boulay, E. P.; Landon, D. N.; McDonald, W. I., Duration and selectivity of blood-brain barrier breakdown in chronic relapsing experimental allergic encephalomyelitis studied by gadolinium-DTPA and protein markers. *Brain* 113 (1990) 365-78.

[88] C.P.M. Hawkins, P. M.; Landon, D. N.; McDonald, W. I., Metabolically dependent blood-brain barrier breakdown in chronic relapsing experimental allergic encephalomyelitis. *Acta Neuropathologica* 83 (1992) 630-5.

[89] S.N. Heckl, T.; Herrmann, M.; Gartner, S.; Klose, U.; Schick, F.; Weissert, R.; Kuker, W., Experimental autoimmune encephalomyelitis (EAE): lesion visualization on a 3 Tesla clinical whole-body system after intraperitoneal contrast injection. *ROFO Fortschr Geb Rontgenstr Nuklearmed* 176 (2004) 1549-54.

[90] A.C.R. Heide, T. L.; Alvord, E. C., Jr.; Peterson, J.; Rose, L. M., Diffusion imaging of experimental allergic encephalomyelitis. *Magnetic Resonance in Medicine* 29 (1993) 478-84.

[91] G.G.-R. Helms, E.; Schlumbohm, C.; Konig, J.; Dechent, P.; Fuchs, E.; Wilke, M., Structural and quantitative neuroimaging of the common marmoset monkey using a clinical MRI system. *Journal of Neuroscience Methods* 215 (2013) 121-31.

[92] S.L.P. Herrera, V. L.; Whittaker, H.; Smith, B. C.; Kim, A.; Schellenberg, A. E.; Thiessen, J. D.; Buist, R.; Del Bigio, M. R.; Martin, M., Damage to the optic chiasm in myelin oligodendrocyte glycoprotein-experimental autoimmune encephalomyelitis mice. *Magnetic Resonance Insights* 7 (2014) 23-31.

[93] D.B.W. Hoffmann, S. K.; Bojcevski, J.; Muller, A.; Stadelmann, C.; Naidoo, V.; Bahr, B. A.; Diem, R.; Fairless, R., Calcium influx and calpain activation mediate preclinical retinal neurodegeneration in autoimmune optic neuritis. *J Neuropathol Exp Neurol* 72 (2013) 745-57.

[94] M.B. Hunger, E.; Zhong, K.; Angenstein, F., Visualization of acute focal lesions in rats with experimental autoimmune encephalomyelitis by magnetic nanoparticles, comparing different MRI sequences including phase imaging. *Journal of Magnetic Resonance Imaging* 39 (2014) 1126-35.

[95] S.A.H. Jagessar, N.; Bauer, J.; Blezer, E. L. A.; Laman, J. D.; Hellings, N.; T Hart, B. A., B-Cell depletion abrogates T cell-mediated demyelination in an antibody-nondependent common marmoset experimental autoimmune encephalomyelitis model. *Journal of Neuropathology and Experimental Neurology* 71 (2012) 716-728.

[96] S.A.K. Jagessar, Y. S.; Heijmans, N.; van Driel, N.; van Straalen, L.; Bajramovic, J. J.; Brok, H. P.; Blezer, E. L.; Bauer, J.; Laman, J. D.; t Hart, B. A., Induction of progressive demyelinating autoimmune encephalomyelitis in common marmoset monkeys using MOG34-56 peptide in incomplete freund adjuvant. *J Neuropathol Exp Neurol* 69 (2010) 372-85.

[97] S.A.S. Jagessar, P. A.; Blezer, E.; Delarasse, C.; Pham-Dinh, D.; Laman, J. D.; Bauer, J.; Amor, S.; t Hart, B., Autoimmunity against myelin oligodendrocyte glycoprotein is dispensable for the initiation although essential for the progression of chronic encephalomyelitis in common marmosets. *J Neuropathol Exp Neurol* 67 (2008) 326-40.

[98] R.P. Jaini, D. C.; Flask, C. A.; Macklin, W. B.; Tuohy, V. K., Myelin antigen load influences antigen presentation and severity of central nervous system autoimmunity. *Journal of neuroimmunology* 259 (2013) 37-46.

- [99] V.A.Z. Janve, Z.; Yao, S. Y.; Li, K.; Zhang, F. L.; Wilson, K. J.; Ou, X.; Does, M. D.; Subramaniam, S.; Gochberg, D. F., The radial diffusivity and magnetization transfer pool size ratio are sensitive markers for demyelination in a rat model of type III multiple sclerosis (MS) lesions. *NeuroImage* 74 (2013) 298-305.
- [100] I.O.Z. Jelescu, M.; Winters, K. V.; Veraart, J.; Rajaratnam, A.; Kim, N. S.; Babb, J. S.; Shepherd, T. M.; Novikov, D. S.; Kim, S. G.; Fieremans, E., In vivo quantification of demyelination and recovery using compartment-specific diffusion MRI metrics validated by electron microscopy. *NeuroImage* 132 (2016) 104-14.
- [101] Y.Z. Jiang, Y.; Chen, S.; Zhu, C.; Wu, A.; Liu, Y.; Ma, L.; Zhu, D.; Ma, X.; Liu, M.; Kang, Z.; Pi, R.; Peng, F.; Wang, Q.; Chen, X., The anti-inflammatory effect of donepezil on experimental autoimmune encephalomyelitis in C57 BL/6 mice. *Neuropharmacology* 73 (2013) 415-24.
- [102] H.L.W. Johnson, R. C.; Jin, F.; Manhart, W. A.; LaFrance, S. J.; Pirko, I.; Johnson, A. J., Perforin competent CD8 T cells are sufficient to cause immune-mediated blood-brain barrier disruption. *PLoS ONE* 9 (2014) e111401.
- [103] E.K.M. Jordan, H. I.; Lewis, B. K.; Tresser, N.; Gates, M. A.; Johnson, M.; Lenardo, M.; Matis, L. A.; McFarland, H. F.; Frank, J. A., Serial MR imaging of experimental autoimmune encephalomyelitis induced by human white matter or by chimeric myelin-basic and proteolipid protein in the common marmoset. *AJNR Am J Neuroradiol* 20 (1999) 965-76.
- [104] Y.S.B. Kap, J.; Driel, Nv; Bleeker, W. K.; Parren, P. W.; Kooi, E. J.; Geurts, J. J.; Laman, J. D.; Craigen, J. L.; Blezer, E.; t Hart, B. A., B-cell depletion attenuates white and gray matter pathology in marmoset experimental autoimmune encephalomyelitis. *J Neuropathol Exp Neurol* 70 (2011) 992-1005.
- [105] Y.S.V.D. Kap, N.; Blezer, E.; Parren, P. W. H. I.; Bleeker, W. K.; Laman, J. D.; Craigen, J. L.; T Hart, B. A., Late B cell depletion with a human anti-human CD20 IgG1 $\kappa$  monoclonal antibody halts the development of experimental autoimmune encephalomyelitis in marmosets. *Journal of Immunology* 185 (2010) 3990-4003.
- [106] S.J.G. Karlik, J. J.; Wong, C.; Vandervoort, M. K.; Noseworthy, J. H., NMR studies in experimental allergic encephalomyelitis: factors which contribute to T1 and T2 values. *Magnetic Resonance in Medicine* 14 (1990) 1-11.
- [107] S.J.G. Karlik, E. A.; Lee, D.; Noseworthy, J. H., Gadolinium enhancement in acute and chronic-progressive experimental allergic encephalomyelitis in the guinea pig. *Magnetic Resonance in Medicine* 30 (1993) 326-31.
- [108] S.J.M. Karlik, D.; St Louis, J.; Strejan, G., Correlation between MRI and clinico-pathological manifestations in Lewis rats protected from experimental allergic encephalomyelitis by acylated synthetic peptide of myelin basic protein. *Magnetic Resonance Imaging* 17 (1999) 731-7.
- [109] S.J.S. Karlik, G.; Gilbert, J. J.; Noseworthy, J. H., NMR studies in experimental allergic encephalomyelitis (EAE): normalization of T1 and T2 with parenchymal cellular infiltration. *Neurology* 36 (1986) 1112-4.
- [110] S.J.K. Kent, S. J.; Rice, G. P.; Horner, H. C., A monoclonal antibody to alpha 4-integrin reverses the MR-detectable signs of experimental allergic encephalomyelitis in the guinea pig. *Journal of Magnetic Resonance Imaging* 5 (1995) 535-40.
- [111] M.G. Khodanovich, V.; Pan, E.; Akulov, A.; Krutenkova, E.; Trusov, V.; Yarnykh, V.; Iop,, MRI study of the cuprizone-induced mouse model of multiple sclerosis: demyelination is not found after co-

treatment with polyprenols (long-chain isoprenoid alcohols), 2nd International Conference and Young Scientist School "Magnetic Resonance Imaging in Biomedical Research", Iop Publishing Ltd, Bristol, 2016.

[112] H.W. Kim, P.; Kerr, C.; Galpoththawela, C.; Gilad, A. A.; Muja, N.; Bulte, J. W., Immunomodulation by transplanted human embryonic stem cell-derived oligodendroglial progenitors in experimental autoimmune encephalomyelitis. *Stem Cells* 30 (2012) 2820-9.

[113] H.W. Kim, P.; Muja, N.; Campanelli, J. T.; Bulte, J. W., ICV-transplanted human glial precursor cells are short-lived yet exert immunomodulatory effects in mice with EAE. *Glia* 60 (2012) 1117-29.

[114] J.H.B. Kim, M. D.; Liang, H. F.; Klein, R. S.; Russell, J. H.; Cross, A. H.; Song, S. K., Detecting axon damage in spinal cord from a mouse model of multiple sclerosis. *Neurobiology of Disease* 21 (2006) 626-32.

[115] K.S. Kirschbaum, J. K.; Zeller, M. W.; Deumelandt, K.; Bode, J.; Sharma, R.; Krüwel, T.; Fischer, M.; Hoffmann, A.; Da Silva, M. C.; Muckenthaler, M. U.; Wick, W.; Tews, B.; Chen, J. W.; Heiland, S.; Bendszus, M.; Platten, M.; Breckwoldt, M. O., In vivo nanoparticle imaging of innate immune cells can serve as a marker of disease severity in a model of multiple sclerosis. *Proceedings of the National Academy of Sciences of the United States of America* 113 (2016) 13227-13232.

[116] B.M.D. Krauspe, W.; Beyer, C.; Baumgartner, W.; Denecke, B.; Janssen, K.; Langhans, C. D.; Clarner, T.; Kipp, M., Short-term cuprizone feeding verifies N-acetylaspartate quantification as a marker of neurodegeneration. *Journal of Molecular Neuroscience* 55 (2015) 733-48.

[117] M.A.E. Kuharik, M. K.; Farlow, M. R.; Becker, G. J.; Azzarelli, B.; Klatte, E. C.; Augustyn, G. T.; Dreesen, R. G., Gd-enhanced MR imaging of acute and chronic experimental demyelinating lesions. *AJNR Am J Neuroradiol* 9 (1988) 643-8.

[118] G.J. Ladewig, L.; Misselwitz, B.; Solymosi, L.; Toyka, K.; Bendszus, M.; Stoll, G., Spatial diversity of blood-brain barrier alteration and macrophage invasion in experimental autoimmune encephalomyelitis: a comparative MRI study. *Experimental Neurology* 220 (2009) 207-11.

[119] J.D.t.H. Laman, B. A.; Brok, H.; Meurs, Mv; Schellekens, M. M.; Kasran, A.; Boon, L.; Bauer, J.; Boer, Md; Ceuppens, J., Protection of marmoset monkeys against EAE by treatment with a murine antibody blocking CD40 (mu5D12). *European Journal of Immunology* 32 (2002) 2218-28.

[120] D.G. Le Blon, C.; Hoornaert, C.; Quarta, A.; Daans, J.; Dooley, D.; Lemmens, E.; Praet, J.; De Vocht, N.; Reekmans, K.; Santermans, E.; Hens, N.; Goossens, H.; Verhoye, M.; Van der Linden, A.; Berneman, Z.; Hendrix, S.; Ponsaerts, P., Intracerebral transplantation of interleukin 13-producing mesenchymal stem cells limits microgliosis, oligodendrocyte loss and demyelination in the cuprizone mouse model. *Journal of Neuroinflammation* 13 (2016) 288.

[121] J.S. Lee, K.; Kang, B. T.; Yao, B.; Fukunaga, M.; van Gelderen, P.; Palumbo, S.; Bosetti, F.; Silva, A. C.; Duyn, J. H., The contribution of myelin to magnetic susceptibility-weighted contrasts in high-field MRI of the brain. *NeuroImage* 59 (2012) 3967-75.

[122] H.B. Levy Barazany, D.; Puckett, L.; Blanga-Kanfi, S.; Borenstein-Auerbach, N.; Yang, K.; Peron, J. P.; Weiner, H. L.; Frenkel, D., Brain MRI of nasal MOG therapeutic effect in relapsing-progressive EAE. *Experimental Neurology* 255 (2014) 63-70.

[123] H.A. Levy, Y.; Frenkel, D., Characterization of brain lesions in a mouse model of progressive multiple sclerosis. *Experimental Neurology* 226 (2010) 148-58.



- [124] Y.Z. Li, Y.; Han, W.; Hu, F.; Qian, Y.; Chen, Q., TRO19622 promotes myelin repair in a rat model of demyelination. *International Journal of Neuroscience* 123 (2013) 810-22.
- [125] K.S. Li-ChunHsieh, S.; Zeller, M. W. G.; Pulli, B.; Ali, M.; Wang, C. H.; Chiou, T. T. Y.; Tsang, Y. M.; Lee, P. S.; Stossel, T. P.; Chen, J. W., Gelsolin decreases actin toxicity and inflammation in murine multiple sclerosis. *Journal of neuroimmunology* 287 (2015) 36-42.
- [126] T.H.K. Lin, J. H.; Perez-Torres, C.; Chiang, C. W.; Trinkaus, K.; Cross, A. H.; Song, S. K., Axonal transport rate decreased at the onset of optic neuritis in EAE mice. *NeuroImage* 100 (2014) 244-53.
- [127] T.H.S. Lin, W. M.; Chiang, C. W.; Trinkaus, K.; Cross, A. H.; Song, S. K., Diffusion fMRI detects white-matter dysfunction in mice with acute optic neuritis. *Neurobiology of Disease* 67 (2014) 1-8.
- [128] R.A.K. Linker, A.; Horn, T.; Gold, R.; Maurer, M.; Bendszus, M., Iron particle-enhanced visualization of inflammatory central nervous system lesions by high resolution: preliminary data in an animal model. *AJNR Am J Neuroradiol* 27 (2006) 1225-9.
- [129] R.A.R. Linker, M.; Bendszus, M.; Ladewig, G.; Briel, A.; Schirner, M.; Maurer, M.; Hauff, P., In vivo molecular imaging of adhesion molecules in experimental autoimmune encephalomyelitis (EAE). *Journal of Autoimmunity* 25 (2005) 199-205.
- [130] G.A.W. Lodygensky, T.; Stump, M.; Holtzman, D. M.; Inder, T. E.; Neil, J. J., In vivo MRI analysis of an inflammatory injury in the developing brain. *Brain Behav Immun* 24 (2010) 759-67.
- [131] A.M. Luchetti, D.; Ruffini, F.; Galli, R.; Falini, A.; Quattrini, A.; Scotti, G.; Comi, G.; Martino, G.; Furlan, R.; Politi, L. S., Monoclonal antibodies conjugated with superparamagnetic iron oxide particles allow magnetic resonance imaging detection of lymphocytes in the mouse brain. *Molecular Imaging* 11 (2012) 114-25.
- [132] A.R. MacKenzie-Graham, G. A.; Avedisian, A.; Gold, S. M.; Frew, A. J.; Aguilar, C.; Lin, D. R.; Umeda, E.; Voskuhl, R. R.; Alger, J. R., Cortical atrophy in experimental autoimmune encephalomyelitis: in vivo imaging. *NeuroImage* 60 (2012) 95-104.
- [133] A.T. MacKenzie-Graham, M. R.; Shah, K. P.; Aguilar, C.; Strickland, L. V.; Boline, J.; Martin, M.; Morales, L.; Shattuck, D. W.; Jacobs, R. E.; Voskuhl, R. R.; Toga, A. W., Cerebellar cortical atrophy in experimental autoimmune encephalomyelitis. *NeuroImage* 32 (2006) 1016-23.
- [134] A.T.-W. MacKenzie-Graham, S. K.; Sharma, G.; Aguilar, C.; Vo, K. T.; Strickland, L. V.; Morales, L.; Fubara, B.; Martin, M.; Jacobs, R. E.; Johnson, G. A.; Toga, A. W.; Voskuhl, R. R., Purkinje cell loss in experimental autoimmune encephalomyelitis. *NeuroImage* 48 (2009) 637-51.
- [135] K.Z. Magalon, C.; Cayre, M.; Khaldi, J.; Bourbon, C.; Robles, I.; Tardif, G.; Viola, A.; Pruss, R. M.; Bordet, T.; Durbec, P., Olesoxime accelerates myelination and promotes repair in models of demyelination. *Annals of Neurology* 71 (2012) 213-26.
- [136] P.M. Maggi, S. M. C.; Gaitán, M. I.; Leibovitch, E.; Wholer, J. E.; Knight, H. L.; Ellis, M.; Wu, T.; Silva, A. C.; Massacesi, L.; Jacobson, S.; Westmoreland, S.; Reich, D. S., The formation of inflammatory demyelinated lesions in cerebral white matter. *Annals of Neurology* (2014).
- [137] S.S. Mardiguan, S.; Ladds, E.; Campbell, S. J.; Wilainam, P.; McFadyen, C.; McAteer, M.; Choudhury, R. P.; Smith, P.; Saunders, F.; Watt, G.; Sibson, N. R.; Anthony, D. C., Anti-IL-17A treatment reduces clinical score and VCAM-1 expression detected by in vivo magnetic resonance imaging in chronic relapsing EAE ABH mice. *American Journal of Pathology* 182 (2013) 2071-81.

- [138] M.P.E. Marriott, B.; Cate, H. S.; Binder, M. D.; Kemper, D.; Wu, Q.; Kolbe, S.; Gordon, I. R.; Wang, H.; Egan, G.; Murray, S.; Butzkueven, H.; Kilpatrick, T. J., Leukemia inhibitory factor signaling modulates both central nervous system demyelination and myelin repair. *Glia* 56 (2008) 686-98.
- [139] M.A.S. McAteer, N. R.; von Zur Muhlen, C.; Schneider, J. E.; Lowe, A. S.; Warrick, N.; Channon, K. M.; Anthony, D. C.; Choudhury, R. P., In vivo magnetic resonance imaging of acute brain inflammation using microparticles of iron oxide. *Nature Medicine* 13 (2007) 1253-8.
- [140] M.A.v.Z.M. McAteer, C.; Anthony, D. C.; Sibson, N. R.; Choudhury, R. P., Magnetic Resonance Imaging of Brain Inflammation Using Microparticles of Iron Oxide. in: K. Shah, (Ed.), *Molecular Imaging: Methods and Protocols*, Humana Press Inc, Totowa, 2011, pp. 103-115.
- [141] C.R.B. McCreary, T. A.; Skihar, V.; Mitchell, J. R.; Yong, V. W.; Dunn, J. F., Multiexponential T2 and magnetization transfer MRI of demyelination and remyelination in murine spinal cord. *NeuroImage* 45 (2009) 1173-82.
- [142] D.B. Merkler, S.; Stadelmann, C.; Ernsting, T.; Michaelis, T.; Frahm, J.; Bruck, W., Multicontrast MRI of remyelination in the central nervous system. *NMR in biomedicine* 18 (2005) 395-403.
- [143] S.H. Mi, B.; Hahm, K.; Luo, Y.; Kam Hui, E. S.; Yuan, Q.; Wong, W. M.; Wang, L.; Su, H.; Chu, T. H.; Guo, J.; Zhang, W.; So, K. F.; Pepinsky, B.; Shao, Z.; Graff, C.; Garber, E.; Jung, V.; Wu, E. X.; Wu, W., LINGO-1 antagonist promotes spinal cord remyelination and axonal integrity in MOG-induced experimental autoimmune encephalomyelitis. *Nature Medicine* 13 (2007) 1228-33.
- [144] J.D.-C. Mikita, N.; Deloire, M. S.; Vekris, A.; Biran, M.; Raffard, G.; Brochet, B.; Canron, M. H.; Franconi, J. M.; Boiziau, C.; Petry, K. G., Altered M1/M2 activation patterns of monocytes in severe relapsing experimental rat model of multiple sclerosis. Amelioration of clinical status by M2 activated monocyte administration. *Multiple Sclerosis* 17 (2011) 2-15.
- [145] J.M.S. Millward, J.; Taupitz, M.; Wagner, S.; Wuerfel, J. T.; Infante-Duarte, C., Iron oxide magnetic nanoparticles highlight early involvement of the choroid plexus in central nervous system inflammation. *ASN Neuro* 5 (2013) e00110.
- [146] J.H.J. Moon, H. W.; Lee, H. C.; Jeon, J. H.; Kim, N. H.; Sur, J. H.; Ha, J.; Jung, D. I., A study of experimental autoimmune encephalomyelitis in dogs as a disease model for canine necrotizing encephalitis. *J vet sci* 16 (2015) 203-11.
- [147] S.P.D. Morrissey, R.; Syha, J.; Simonis, C.; Zettl, U.; Archelos, J. J.; Jung, S.; Stodal, H.; Lassmann, H.; Toyka, K. V.; Haase, A.; Hartung, H. P., Partial inhibition of AT-EAE by an antibody to ICAM-1: clinicohistological and MRI studies. *Journal of neuroimmunology* 69 (1996) 85-93.
- [148] S.P.S. Morrissey, H.; Zettl, U.; Simonis, C.; Jung, S.; Kiefer, R.; Lassmann, H.; Hartung, H. P.; Haase, A.; Toyka, K. V., In vivo MRI and its histological correlates in acute adoptive transfer experimental allergic encephalomyelitis. Quantification of inflammation and oedema. *Brain* 119 (1996) 239-48.
- [149] N.C. Muja, M. E.; Zhang, J.; Kim, H.; Gilad, A. A.; Walczak, P.; Ben-Hur, T.; Bulte, J. W., Neural precursors exhibit distinctly different patterns of cell migration upon transplantation during either the acute or chronic phase of EAE: a serial MR imaging study. *Magnetic Resonance in Medicine* 65 (2011) 1738-49.
- [150] I.J.S. Namaer, J.; Poulet, P.; Armspach, J. P.; Mauss, Y.; Chambron, J., In vivo dynamic MR imaging of MBP-induced acute experimental allergic encephalomyelitis in Lewis rat. *Magnetic Resonance in Medicine* 24 (1992) 325-334.

- [151] I.J.S. Namer, J.; Poulet, P.; Armspach, J. P.; Mohr, M.; Mauss, Y.; Chambron, J., Blood-brain barrier breakdown in MBP-specific T cell induced experimental allergic encephalomyelitis. A quantitative in vivo MRI study. *Brain* 116 (1993) 147-59.
- [152] I.J.S. Namer, J.; Piddlesden, S. J.; Mohr, M.; Poulet, P.; Chambron, J., Magnetic resonance imaging of antibody-mediated demyelinating experimental allergic encephalomyelitis. *Journal of neuroimmunology* 54 (1994) 41-50.
- [153] I.J.S. Namer, J.; Poulet, P.; Mauss, Y.; Armspach, J. P.; Eclancher, B.; Chambron, J., Hyperbaric oxygen treatment in acute experimental allergic encephalomyelitis. Contribution of magnetic resonance imaging study. *NeuroImage* 1 (1994) 308-12.
- [154] I.J.S. Namer, J.; Klinguer, C.; Trifilieff, E.; Mohr, M.; Poulet, P., Magnetic resonance imaging of PLP-induced experimental allergic encephalomyelitis in Lewis rats. *Journal of neuroimmunology* 92 (1998) 22-8.
- [155] N.A. Nathoo, S.; Wu, Y.; Haylock-Jacobs, S.; Yong, V. W.; Foniok, T.; Barnes, S.; Obenaus, A.; Dunn, J. F., Susceptibility-weighted imaging in the experimental autoimmune encephalomyelitis model of multiple sclerosis indicates elevated deoxyhemoglobin, iron deposition and demyelination. *Multiple Sclerosis* 19 (2013) 721-31.
- [156] N.R. Nathoo, J. A.; Yong, V. W.; Dunn, J. F., Detecting deoxyhemoglobin in spinal cord vasculature of the experimental autoimmune encephalomyelitis mouse model of multiple sclerosis using susceptibility MRI and hyperoxygenation. *PLoS ONE* 10 (2015) e0127033.
- [157] S.B. Nessler, S.; Stadelmann, C.; Bittner, A.; Merkler, D.; Hartung, H. P.; Michaelis, T.; Bruck, W.; Frahm, J.; Sommer, N.; Hemmer, B., Early MRI changes in a mouse model of multiple sclerosis are predictive of severe inflammatory tissue damage. *Brain* 130 (2007) 2186-98.
- [158] T.T.Y. Nie, G.; Jia, Y. L.; Zhang, T.; Shen, Z. W.; Zhang, H. D.; Xu, H. Y.; Wu, R. H., Region-Specific Susceptibilities to Cuprizone-Induced Demyelination of C57BL/6 Mouse: In vivo T2WI and DTI Studies at 7.0T. *Appl. Magn. Reson.* 45 (2014) 759-769.
- [159] J.H.G. Noseworthy, J. J.; Vandervoort, M. K.; Karlik, S. J., Postnatal NMR changes in guinea pig central nervous system: potential relevance to experimental allergic encephalomyelitis. *Magnetic Resonance in Medicine* 6 (1988) 199-211.
- [160] U.M. Noth, S. P.; Deichmann, R.; Jung, S.; Adolf, H.; Haase, A.; Lutz, J., Perfluoro-15-crown-5-ether labelled macrophages in adoptive transfer experimental allergic encephalomyelitis. *Artif Cells Blood Substit Immobil Biotechnol* 25 (1997) 243-54.
- [161] J.K. Orije, F.; Guglielmetti, C.; Praet, J.; Van der Linden, A.; Ponsaerts, P.; Verhoye, M., Longitudinal monitoring of metabolic alterations in cuprizone mouse model of multiple sclerosis using <sup>1</sup>H-magnetic resonance spectroscopy. *NeuroImage* 114 (2015) 128-35.
- [162] R.D.B. Oude Engberink, E. L.; Dijkstra, C. D.; van der Pol, S. M.; van der Toorn, A.; de Vries, H. E., Dynamics and fate of USPIO in the central nervous system in experimental autoimmune encephalomyelitis. *NMR in biomedicine* 23 (2010) 1087-96.
- [163] A.J.D. Oweida, E. A.; Foster, P. J., Cellular imaging at 1.5 T: detecting cells in neuroinflammation using active labeling with superparamagnetic iron oxide. *Molecular Imaging* 3 (2004) 85-95.
- [164] A.J.D. Oweida, E. A.; Karlik, S. J.; Dekaban, G. A.; Foster, P. J., Iron-oxide labeling of hematogenous macrophages in a model of experimental autoimmune encephalomyelitis and the contribution to

signal loss in fast imaging employing steady state acquisition (FIESTA) images. *Journal of Magnetic Resonance Imaging* 26 (2007) 144-51.

[165] J.D. Palazuelos, N.; Julien, B.; Hatterer, E.; Aguado, T.; Mechoulam, R.; Benito, C.; Romero, J.; Silva, A.; Guzmán, M.; Nataf, S.; Galve-Roperh, I., The CB2 cannabinoid receptor controls myeloid progenitor trafficking: Involvement in the pathogenesis of an animal model of multiple sclerosis. *Journal of Biological Chemistry* 283 (2008) 13320-13324.

[166] M.M.R. Paz Soldan, M. R.; Gamez, J. D.; Lohrey, A. K.; Chen, Y.; Pirko, I.; Johnson, A. J., Correlation of Brain Atrophy, Disability, and Spinal Cord Atrophy in a Murine Model of Multiple Sclerosis. *Journal of Neuroimaging* 25 (2015) 595-9.

[167] G.V.V.d.V. Peersman, F. L.; Lohman, J. E.; Lubke, U.; Gheuens, J.; Bellon, E.; Connelly, A.; Martin, J. J., High resolution nuclear magnetic resonance imaging of the spinal cord in experimental demyelinating disease. *Acta Neuropathologica* 76 (1988) 628-32.

[168] A.A. Petiet, M. S.; Stankoff, B., Gray and White Matter Demyelination and Remyelination Detected with Multimodal Quantitative MRI Analysis at 11.7T in a Chronic Mouse Model of Multiple Sclerosis. *Frontiers in Neuroscience* 10 (2016) 491.

[169] Å.W. Pettersson, X. C.; Ciumas, C.; Lian, H.; Chirsky, V.; Huang, Y. M.; Bjelke, B.; Link, H.; Xiao, B. G., CD8 $\alpha$ + dendritic cells and immune protection from experimental allergic encephalomyelitis. *Clinical and Experimental Immunology* 137 (2004) 486-495.

[170] P.S.Y. Piraino, T. A.; Freedman, S. B.; Messersmith, E. K.; Pleiss, M. A.; Karlik, S. J., Suppression of acute experimental allergic encephalomyelitis with a small molecule inhibitor of alpha4 integrin. *Multiple Sclerosis* 11 (2005) 683-90.

[171] I.C. Pirko, B.; Johnson, A. J.; Gamez, J.; Rodriguez, M.; Macura, S., Magnetic resonance imaging of immune cells in inflammation of central nervous system. *Croat Med J* 44 (2003) 463-8.

[172] I.C. Pirko, B.; Gamez, J.; Bieber, A. J.; Warrington, A. E.; Johnson, A. J.; Hanson, D. P.; Pease, L. R.; Macura, S. I.; Rodriguez, M., A human antibody that promotes remyelination enters the CNS and decreases lesion load as detected by T2-weighted spinal cord MRI in a virus-induced murine model of MS. *FASEB Journal* 18 (2004) 1577-9.

[173] I.C. Pirko, R.; Chen, Y.; Lohrey, A. K.; Lindquist, D. M.; Dunn, R. S.; Zivadinov, R.; Johnson, A. J., CMV infection attenuates the disease course in a murine model of multiple sclerosis. *PLoS ONE* 7 (2012) e32767.

[174] I.C. Pirko, Y.; Lohrey, A. K.; McDole, J.; Gamez, J. D.; Allen, K. S.; Pavelko, K. D.; Lindquist, D. M.; Dunn, R. S.; Macura, S. I.; Johnson, A. J., Contrasting roles for CD4 vs. CD8 T-cells in a murine model of virally induced "T1 black hole" formation. *PLoS ONE* 7 (2012) e31459.

[175] I.G. Pirko, J.; Johnson, A. J.; Macura, S. I.; Rodriguez, M., Dynamics of MRI lesion development in an animal model of viral-induced acute progressive CNS demyelination. *NeuroImage* 21 (2004) 576-82.

[176] I.J. Pirko, A.; Ciric, B.; Gamez, J.; Macura, S. I.; Pease, L. R.; Rodriguez, M., In vivo magnetic resonance imaging of immune cells in the central nervous system with superparamagnetic antibodies. *FASEB Journal* 18 (2004) 179-82.

[177] I.J. Pirko, A.; Gamez, J.; Macura, S. I.; Rodriguez, M., Disappearing "T1 black holes" in an animal model of multiple sclerosis. *Frontiers in Bioscience* 9 (2004) 1222-7.

- [178] I.J. Pirko, A. J.; Lohrey, A. K.; Chen, Y.; Ying, J., Deep gray matter T2 hypointensity correlates with disability in a murine model of MS. *Journal of the Neurological Sciences* 282 (2009) 34-8.
- [179] I.J. Pirko, A. J.; Chen, Y.; Lindquist, D. M.; Lohrey, A. K.; Ying, J.; Dunn, R. S., Brain atrophy correlates with functional outcome in a murine model of multiple sclerosis. *NeuroImage* 54 (2011) 802-6.
- [180] L.S.B. Politi, M.; Brambilla, E.; Cadioli, M.; Falini, A.; Comi, G.; Scotti, G.; Martino, G.; Pluchino, S., Magnetic-resonance-based tracking and quantification of intravenously injected neural stem cell accumulation in the brains of mice with experimental multiple sclerosis. *Stem Cells* 25 (2007) 2583-92.
- [181] J.O. Praet, J.; Kara, F.; Guglielmetti, C.; Santermans, E.; Daans, J.; Hens, N.; Verhoye, M.; Berneman, Z.; Ponsaerts, P.; Van der Linden, A., Cuprizone-induced demyelination and demyelination-associated inflammation result in different proton magnetic resonance metabolite spectra. *NMR in biomedicine* 28 (2015) 505-13.
- [182] X.L. Qi, A. S.; Sun, L.; Hauswirth, W. W.; Guy, J., Suppression of mitochondrial oxidative stress provides long-term neuroprotection in experimental optic neuritis. *Investigative Ophthalmology & Visual Science* 48 (2007) 681-91.
- [183] X.S. Qi, L.; Lewin, A. S.; Hauswirth, W. W.; Guy, J., Long-term suppression of neurodegeneration in chronic experimental optic neuritis: antioxidant gene therapy. *Investigative Ophthalmology & Visual Science* 48 (2007) 5360-70.
- [184] M.H. Rausch, P.; Baumann, D.; Cannet, C.; Rudin, M., MRI-based monitoring of inflammation and tissue damage in acute and chronic relapsing EAE. *Magnetic Resonance in Medicine* 50 (2003) 309-14.
- [185] M.H. Rausch, P.; Foster, C. A.; Baumann, D. R.; Cannet, C.; Rudin, M., Predictability of FTY720 efficacy in experimental autoimmune encephalomyelitis by in vivo macrophage tracking: clinical implications for ultrasmall superparamagnetic iron oxide-enhanced magnetic resonance imaging. *Journal of Magnetic Resonance Imaging* 20 (2004) 16-24.
- [186] M.T. Rausch, P.; Lervik, P.; Walmsley, A.; Mir, A.; Schubart, A.; Seabrook, T., Characterization of white matter damage in animal models of multiple sclerosis by magnetization transfer ratio and quantitative mapping of the apparent bound proton fraction  $f$ . *Multiple Sclerosis* 15 (2009) 16-27.
- [187] T.L.A. Richards, E. C., Jr.; Peterson, J.; Cosgrove, S.; Petersen, R.; Petersen, K.; Heide, A. C.; Cluff, J.; Rose, L. M., Experimental allergic encephalomyelitis in non-human primates: MRI and MRS may predict the type of brain damage. *NMR in biomedicine* 8 (1995) 49-58.
- [188] K.M.N. Robinson, J. M.; Phillips, D. A.; Proctor, T. M.; Rooney, W. D.; Jones, R. E., MR imaging of inflammation during myelin-specific T cell-mediated autoimmune attack in the EAE mouse spinal cord. *Mol Imaging Biol* 12 (2010) 240-9.
- [189] L.M.R. Rose, T. L.; Alvord, E. C., Jr., Magnetic resonance imaging and peripheral blood abnormalities in experimental allergic encephalomyelitis. *Biomed Pharmacother* 43 (1989) 347-53.
- [190] L.M.R. Rose, T. L.; Peterson, J.; Petersen, R.; Alvord, E. C., Jr., Resolution of CNS lesions following treatment of experimental allergic encephalomyelitis in macaques with monoclonal antibody to the CD18 leukocyte integrin. *Multiple Sclerosis* 2 (1997) 259-66.
- [191] N.M. Saskia Hübner, A. E.; Lee, H. L.; Reisert, M.; Bienert, T.; Hennig, J.; von Elverfeldt, D.; Harsan, L. A., The connectomics of brain demyelination: Functional and structural patterns in the cuprizone mouse model. *NeuroImage* 146 (2017) 1-18.

- [192] A.E.B. Schellenberg, R.; Yong, V. W.; Del Bigio, M. R.; Peeling, J., Magnetic resonance imaging of blood-spinal cord barrier disruption in mice with experimental autoimmune encephalomyelitis. *Magnetic Resonance in Medicine* 58 (2007) 298-305.
- [193] C.S. Schneider, G.; Zollner, T. M., Acute neuroinflammation in Lewis rats - a model for acute multiple sclerosis relapses. *Journal of neuroimmunology* 213 (2009) 84-90.
- [194] P.A.S. Seeldrayers, J.; Morrissey, S. P.; Stodal, H.; Vass, K.; Jung, S.; Gneiting, T.; Lassmann, H.; Haase, A.; Hartung, H. P.; et al., Magnetic resonance imaging investigation of blood-brain barrier damage in adoptive transfer experimental autoimmune encephalomyelitis. *Journal of neuroimmunology* 46 (1993) 199-206.
- [195] S.A. Serres, D. C.; Jiang, Y.; Broom, K. A.; Campbell, S. J.; Tyler, D. J.; van Kasteren, S. I.; Davis, B. G.; Sibson, N. R., Systemic inflammatory response reactivates immune-mediated lesions in rat brain. *Journal of Neuroscience* 29 (2009) 4820-8.
- [196] S.B. Serres, C.; de Pablos, R. M.; Merkler, D.; Soto, M. S.; Sibson, N. R.; Anthony, D. C., Magnetic resonance imaging reveals therapeutic effects of interferon-beta on cytokine-induced reactivation of rat model of multiple sclerosis. *J Cereb Blood Flow Metab* 33 (2013) 744-53.
- [197] S.M. Serres, S.; Campbell, S. J.; McAteer, M. A.; Akhtar, A.; Krapitchev, A.; Choudhury, R. P.; Anthony, D. C.; Sibson, N. R., VCAM-1-targeted magnetic resonance imaging reveals subclinical disease in a mouse model of multiple sclerosis. *FASEB Journal* 25 (2011) 4415-22.
- [198] N.R.B. Sibson, A. M.; Bernades-Silva, M.; Laurent, S.; Boutry, S.; Muller, R. N.; Styles, P.; Anthony, D. C., MRI detection of early endothelial activation in brain inflammation. *Magnetic Resonance in Medicine* 51 (2004) 248-52.
- [199] B.A.T. Singer, N. J.; Frank, J. A.; McFarland, H. F.; Biddison, W. E., Induction of experimental allergic encephalomyelitis in the NIH minipig. *Journal of neuroimmunology* 105 (2000) 7-19.
- [200] D.A.G. Sipkins, K.; Tropper, F. D.; Bednarski, M.; Li, K. C. P.; Steinman, L., ICAM-1 expression in autoimmune encephalitis visualized using magnetic resonance imaging. *Journal of neuroimmunology* 104 (2000) 1-9.
- [201] S.K.Y. Song, J.; Le, T. Q.; Lin, S. J.; Sun, S. W.; Cross, A. H.; Armstrong, R. C., Demyelination increases radial diffusivity in corpus callosum of mouse brain. *NeuroImage* 26 (2005) 132-40.
- [202] R.M.H. Stassart, G.; Garea-Rodríguez, E.; Nessler, S.; Hayardeny, L.; Wegner, C.; Schlumbohm, C.; Fuchs, E.; Brück, W., A New Targeted Model of Experimental Autoimmune Encephalomyelitis in the Common Marmoset. *Brain Pathology* 26 (2016) 452-464.
- [203] A.W. Steinbrecher, T.; Neuberger, T.; Mueller, A. M.; Pedre, X.; Giegerich, G.; Bogdahn, U.; Jakob, P.; Haase, A.; Faber, C., Experimental autoimmune encephalomyelitis in the rat spinal cord: lesion detection with high-resolution MR microscopy at 17.6 T. *AJNR Am J Neuroradiol* 26 (2005) 19-25.
- [204] W.A.A. Stewart, E. C.; Hruby, S.; Hall, L. D.; Paty, D. W., Early detection of experimental allergic encephalomyelitis by magnetic resonance imaging. *Lancet* 2 (1985) 898.
- [205] W.A.A. Stewart, E. C., Jr.; Hruby, S.; Hall, L. D.; Paty, D. W., Magnetic resonance imaging of experimental allergic encephalomyelitis in primates. *Brain* 114 (1991) 1069-96.
- [206] G.W. Stoll, C.; Gold, R.; Solymosi, L.; Toyka, K. V.; Bendszus, M., In vivo monitoring of macrophage infiltration in experimental autoimmune neuritis by magnetic resonance imaging. *Journal of neuroimmunology* 149 (2004) 142-6.

- [207] S.W.L. Sun, H. F.; Trinkaus, K.; Cross, A. H.; Armstrong, R. C.; Song, S. K., Noninvasive detection of cuprizone induced axonal damage and demyelination in the mouse corpus callosum. *Magnetic Resonance in Medicine* 55 (2006) 302-8.
- [208] S.W.L. Sun, H. F.; Schmidt, R. E.; Cross, A. H.; Song, S. K., Selective vulnerability of cerebral white matter in a murine model of multiple sclerosis detected using diffusion tensor imaging. *Neurobiology of Disease* 28 (2007) 30-8.
- [209] B.A.B. T Hart, J.; Muller, H. J.; Melchers, B.; Nicolay, K.; Brok, H.; Bontrop, R. E.; Lassmann, H.; Massacesi, L., Histopathological characterization of magnetic resonance imaging- detectable brain white matter lesions in a primate model of multiple sclerosis: A correlative study in the experimental autoimmune encephalomyelitis model in common marmosets (*Callithrix jacchus*). *American Journal of Pathology* 153 (1998) 649-663.
- [210] B.A.B. t Hart, E. L.; Brok, H. P.; Boon, L.; de Boer, M.; Bauer, J.; Laman, J. D., Treatment with chimeric anti-human CD40 antibody suppresses MRI-detectable inflammation and enlargement of pre-existing brain lesions in common marmosets affected by MOG-induced EAE. *Journal of neuroimmunology* 163 (2005) 31-9.
- [211] B.A.B. t Hart, H. P.; Remarque, E.; Benson, J.; Treacy, G.; Amor, S.; Hintzen, R. Q.; Laman, J. D.; Bauer, J.; Blezer, E. L., Suppression of ongoing disease in a nonhuman primate model of multiple sclerosis by a human-anti-human IL-12p40 antibody. *Journal of Immunology* 175 (2005) 4761-8.
- [212] I.O.C. Tagge, A.; Chaudhary, P.; Pollaro, J.; Berlow, Y.; Chalupsky, M.; Bourdette, D.; Woltjer, R.; Johnson, M.; Rooney, W., Spatio-Temporal Patterns of Demyelination and Remyelination in the Cuprizone Mouse Model. *PLoS ONE* 11 (2016) e0152480.
- [213] J.F.N.-L. Talbott, Y. S.; Wendland, M. F.; Mukherjee, P.; Huie, J. R.; Hess, C. P.; Mabray, M. C.; Bresnahan, J. C.; Beattie, M. S., Diffusion-Weighted Magnetic Resonance Imaging Characterization of White Matter Injury Produced by Axon-Sparing Demyelination and Severe Contusion Spinal Cord Injury in Rats. *Journal of neurotrauma* 33 (2016) 929-42.
- [214] V.Y. Talla, C.; Shaw, G.; Porciatti, V.; Koilkonda, R. D.; Guy, J., Noninvasive assessments of optic nerve neurodegeneration in transgenic mice with isolated optic neuritis. *Investigative Ophthalmology & Visual Science* 54 (2013) 4440-50.
- [215] S.P.-J. Tambalo, L.; Rigolio, R.; Fiorini, S.; Bontempi, P.; Mallucci, G.; Balzarotti, B.; Marmiroli, P.; Sbarbati, A.; Cavaletti, G.; Pluchino, S.; Marzola, P., Functional Magnetic Resonance Imaging of Rats with Experimental Autoimmune Encephalomyelitis Reveals Brain Cortex Remodeling. *Journal of Neuroscience* 35 (2015) 10088-100.
- [216] J.D.Z. Thiessen, Y.; Zhang, H.; Wang, L.; Buist, R.; Del Bigio, M. R.; Kong, J.; Li, X. M.; Martin, M., Quantitative MRI and ultrastructural examination of the cuprizone mouse model of demyelination. *NMR in biomedicine* 26 (2013) 1562-81.
- [217] J.E.X. Tobin, M.; Le, T. Q.; Song, S. K.; Armstrong, R. C., Reduced axonopathy and enhanced remyelination after chronic demyelination in fibroblast growth factor 2 (*Fgf2*)-null mice: differential detection with diffusion tensor imaging. *J Neuropathol Exp Neurol* 70 (2011) 157-65.
- [218] O.B. Torkildsen, L. A.; Thorsen, F.; Mork, S. J.; Stangel, M.; Myhr, K. M.; Bo, L., Effects of dietary intervention on MRI activity, de- and remyelination in the cuprizone model for demyelination. *Experimental Neurology* 215 (2009) 160-6.

- [219] T.H. Tourdias, B.; Raffard, G.; Biran, M.; Nishiguchi, T.; Aussudre, J.; Franconi, J. M.; Brochet, B.; Petry, K. G.; Dousset, V., Adapted focal experimental autoimmune encephalomyelitis to allow MRI exploration of multiple sclerosis features. *Experimental Neurology* 230 (2011) 248-57.
- [220] T.M. Tourdias, N.; Dragonu, I.; Cassagno, N.; Boiziau, C.; Aussudre, J.; Brochet, B.; Moonen, C.; Petry, K. G.; Dousset, V., Differential aquaporin 4 expression during edema build-up and resolution phases of brain inflammation. *Journal of Neuroinflammation* 8 (2011) 143.
- [221] L.M. Turati, M.; Mastropietro, A.; Dowell, N. G.; Zucca, I.; Erbetta, A.; Cordiglieri, C.; Brenna, G.; Bianchi, B.; Mantegazza, R.; Cercignani, M.; Baggi, F.; Minati, L., In vivo quantitative magnetization transfer imaging correlates with histology during de- and remyelination in cuprizone-treated mice. *NMR in biomedicine* 28 (2015) 327-37.
- [222] E.A. Tysiak, P.; Aktas, O.; Waiczies, H.; Smyth, M.; Schnorr, J.; Taupitz, M.; Wuerfel, J., Beyond blood brain barrier breakdown - in vivo detection of occult neuroinflammatory foci by magnetic nanoparticles in high field MRI. *Journal of Neuroinflammation* 6 (2009) 20.
- [223] R.J. Van Lambalgen, M., Experimental allergic encephalomyelitis in rhesus monkeys: II. Treatment of EAE with anti-T lymphocyte subset monoclonal antibodies. *Clin Exp Immunol* 68 (1987) 305-12.
- [224] M.R.G. Verhoye, E. J.; Raman, E. R.; Van Reempts, J.; Van der Linden, A., In vivo noninvasive determination of abnormal water diffusion in the rat brain studied in an animal model for multiple sclerosis by diffusion-weighted NMR imaging. *Magnetic Resonance Imaging* 14 (1996) 521-32.
- [225] E.R. Vowinckel, D.; Becher, B.; Verge, G.; Evans, A.; Owens, T.; Antel, J. P., PK11195 binding to the peripheral benzodiazepine receptor as a marker of microglia activation in multiple sclerosis and experimental autoimmune encephalomyelitis. *Journal of Neuroscience Research* 50 (1997) 345-53.
- [226] H.L. Waiczies, S.; Drechsler, S.; Qadri, F.; Purfurst, B.; Sydow, K.; Dathe, M.; Kuhne, A.; Lindel, T.; Hoffmann, W.; Pohlmann, A.; Niendorf, T.; Waiczies, S., Visualizing brain inflammation with a shingled-leg radio-frequency head probe for 19F/1H MRI. *Scientific Reports* 3 (2013) 1280.
- [227] H.M. Waiczies, J. M.; Lepore, S.; Infante-Duarte, C.; Pohlmann, A.; Niendorf, T.; Waiczies, S., Identification of cellular infiltrates during early stages of brain inflammation with magnetic resonance microscopy. *PLoS ONE* 7 (2012) e32796.
- [228] X.B. Wang, J. K.; Kim, J. H.; Chen, Y. J.; O'Neal, J.; O'Neil, S. P.; Tu, T. W.; Trinkaus, K.; Song, S. K., Diffusion tensor imaging detects treatment effects of FTY720 in experimental autoimmune encephalomyelitis mice. *NMR in biomedicine* 26 (2013) 1742-1750.
- [229] X.C. Wang, M. F.; Wang, Y.; Sun, P.; Libbey, J. E.; Trinkaus, K.; Fujinami, R. S.; Song, S. K., Diffusion basis spectrum imaging detects and distinguishes coexisting subclinical inflammation, demyelination and axonal injury in experimental autoimmune encephalomyelitis mice. *NMR in biomedicine* 27 (2014) 843-852.
- [230] Y.W. Wang, Q.; Haldar, J. P.; Yeh, F. C.; Xie, M.; Sun, P.; Tu, T. W.; Trinkaus, K.; Klein, R. S.; Cross, A. H.; Song, S. K., Quantification of increased cellularity during inflammatory demyelination. *Brain* 134 (2011) 3590-601.
- [231] R.R. Williams, A. M.; Wang, W. T.; Choi, I. Y.; Lee, P.; Berman, N. E.; Lynch, S. G.; LeVine, S. M., Iron deposition is independent of cellular inflammation in a cerebral model of multiple sclerosis. *BMC Neurosci* 12 (2011) 59.



- [232] T.C.S. Wood, C.; Hurley, S. A.; Vernon, A. C.; Torres, J.; Dell'Acqua, F.; Williams, S. C. R.; Cash, D., Whole-brain ex-vivo quantitative MRI of the cuprizone mouse model. *PeerJ* 2016 (2016).
- [233] Q.Z.Y. Wu, Q.; Cate, H. S.; Kemper, D.; Binder, M.; Wang, H. X.; Fang, K.; Quick, M. J.; Marriott, M.; Kilpatrick, T. J.; Egan, G. F., MRI identification of the rostral-caudal pattern of pathology within the corpus callosum in the cuprizone mouse model. *Journal of Magnetic Resonance Imaging* 27 (2008) 446-53.
- [234] E.I.-D. Wuerfel, C.; Glumm, R.; Wuerfel, J. T., Gadofluorine M-enhanced MRI shows involvement of circumventricular organs in neuroinflammation. *Journal of Neuroinflammation* 7 (2010) 70.
- [235] J.T. Wuerfel, E.; Prozorovski, T.; Smyth, M.; Mueller, S.; Schnorr, J.; Taupitz, M.; Zipp, F., Mouse model mimics multiple sclerosis in the clinico-radiological paradox. *European Journal of Neuroscience* 26 (2007) 190-8.
- [236] B.G.W. Xiao, X. C.; Yang, J. S.; Xu, L. Y.; Liu, X.; Huang, Y. M.; Bjelke, B.; Link, H., Therapeutic potential of IFN-gamma-modified dendritic cells in acute and chronic experimental allergic encephalomyelitis. *Int Immunol* 16 (2004) 13-22.
- [237] S.J. Xu, E. K.; Brocke, S.; Bulte, J. W.; Quigley, L.; Tresser, N.; Ostuni, J. L.; Yang, Y.; McFarland, H. F.; Frank, J. A., Study of relapsing remitting experimental allergic encephalomyelitis SJL mouse model using MION-46L enhanced in vivo MRI: early histopathological correlation. *Journal of Neuroscience Research* 52 (1998) 549-58.
- [238] S.J. Xu, E. K.; Li, W.; Yang, Y.; Chesnick, S. A.; Webster, H. D.; Brocke, S.; Quigley, L.; McFarland, H. F.; Frank, J. A., In vivo three-dimensional MR microscopy of mice with chronic relapsing experimental autoimmune encephalomyelitis after treatment with insulin-like growth factor-I. *AJNR Am J Neuroradiol* 19 (1998) 653-8.
- [239] O.S. Yu, J.; Mauss, Y.; Guignard, B.; Eclancher, B.; Chambron, J.; Grucker, D., Remyelination assessment by MRI texture analysis in a cuprizone mouse model. *Magnetic Resonance Imaging* 22 (2004) 1139-44.
- [240] W.D. Zaaraoui, M.; Merle, M.; Girard, C.; Raffard, G.; Biran, M.; Inglese, M.; Petry, K. G.; Gonen, O.; Brochet, B.; Franconi, J. M.; Dousset, V., Monitoring demyelination and remyelination by magnetization transfer imaging in the mouse brain at 9.4 T. *Magma* 21 (2008) 357-62.
- [241] J.J. Zhang, M. V.; McMahon, M. T.; Mori, S.; Calabresi, P. A., In vivo and ex vivo diffusion tensor imaging of cuprizone-induced demyelination in the mouse corpus callosum. *Magnetic Resonance in Medicine* 67 (2012) 750-759.
- [242] Y.W. Zhang, J.; Buist, R.; Peeling, J.; Yong, V. W.; Mitchell, J. R., A novel MRI texture analysis of demyelination and inflammation in relapsing-remitting experimental allergic encephalomyelitis. *Med Image Comput Comput Assist Interv Int Conf Med Image Comput Comput Assist Interv* 9 (2006) 760-7.
- [243] Y.W. Zhang, J.; Buist, R.; Peeling, J.; Yong, V. W.; Mitchell, J. R., Active inflammation increases the heterogeneity of MRI texture in mice with relapsing experimental allergic encephalomyelitis. *Magnetic Resonance Imaging* 32 (2014) 168-74.
- [244] J.N. Zhong, K.; Morel, P. A.; Xu, H.; Ahrens, E. T., In Vivo Quantification of Inflammation in Experimental Autoimmune Encephalomyelitis Rats Using Fluorine-19 Magnetic Resonance Imaging Reveals Immune Cell Recruitment outside the Nervous System. *PLoS ONE* 10 (2015) e0140238.
